# Supplementary material for: The effect of the electrophilic group on the hierarchy of nucleofuges in the aminolysis reactions of thiol- and dithiocarbonates with secondary alicyclic amines: A kinetic and theoretical study
Source: Royal Society of Chemistry journal article supplement (doi:10.1039/c9nj00385a), 2019-01-01
Supplement: c9nj00385a1.pdf [file c9nj00385a1.pdf]

## Electronic Supporting Information:

### The effect of electrophilic group on the hierarchy of nucleofuge in the aminolysis reactions of thiol- and dithiocarbonates with Secondary Alicyclic Amines. Kinetic and theoretical study.

#### Table of contents

|                                                                                                                                                                                                                                                                       |     |
|-----------------------------------------------------------------------------------------------------------------------------------------------------------------------------------------------------------------------------------------------------------------------|-----|
| Table S1. Experimental conditions and pseudo-first order rate constants ( $k_{\text{obs}}$ ) for the reaction of S-phenyl O-(4-nitrophenyl) dithiocarbonate ( <b>1</b> ) with SA-amines in aqueous ethanol 44 wt %, at 25 °C and ionic strength 0.2M                  | S4  |
| Table S2. Experimental conditions and pseudo-first order rate constants ( $k_{\text{obs}}$ ) for the reaction of S-(4-chlorophenyl) O-(4-nitrophenyl) dithiocarbonate ( <b>3</b> ) with SA-amines in aqueous ethanol 44 wt %, at 25 °C and ionic strength 0.2M (KCl). | S7  |
| Figure S1: Plot of $k_{\text{obs}}$ vs. free Formylperazine concentration, for the reactions of <b>1</b> and <b>2</b>                                                                                                                                                 | S10 |
| Figure S2. HPLC analysis of the reaction of <b>1</b> (A) and <b>3</b> (B) with excess of morpholine at wavelength 290 nm. The number are defined in Scheme 1 in the manuscript.                                                                                       | S11 |
| Table S3. Energy gap (kcal mol <sup>-1</sup> ) of intermediate T <sup>-</sup> and the corresponding TS for the reaction of compounds 1, 2, 3 and 4 with morpholine, assisted by zero, one and two explicit water molecules.                                           | S12 |
| Table S4. Energy gap (kcal mol <sup>-1</sup> ) of intermediate T <sup>±</sup> and the corresponding TS for the reaction of compounds 1, 2, 3 and 4 with morpholine, assisted by zero, one and two explicit water molecules.                                           | S13 |
| Table S5. Natural atomic charges over reactive center for the T <sup>-</sup> and TS, for the intermediate 8a.                                                                                                                                                         | S14 |
| Table S6. Natural atomic charges over reactive center for the T <sup>-</sup> and TS, for the intermediate 8b.                                                                                                                                                         | S14 |
| Table S7. Natural atomic charges over reactive center for the T <sup>-</sup> and TS, for the intermediate 9a.                                                                                                                                                         | S14 |

|                                                                                                                                                                                                                                                                                             |     |
|---------------------------------------------------------------------------------------------------------------------------------------------------------------------------------------------------------------------------------------------------------------------------------------------|-----|
| Table S8. Natural atomic charges over reactive center for the T- and TS, for the intermediate 9b.                                                                                                                                                                                           | S14 |
| Table S9. Cartesian coordinates, energy (u.a.) and number of imaginary frequencies (NIMAG) for Transition State (TS) associated to the departure of 4BZS <sup>-</sup> anion from 8a with one explicit water molecule, calculated using B3LYP/6-31G++(d,p) level theory                      | S15 |
| Table S10. Cartesian coordinates, energy (u.a.) and number of imaginary frequencies (NIMAG) for Transition State (TS) associated to the departure of 4NPO <sup>-</sup> anion from 8a with one explicit water molecule, calculated using B3LYP/6-31G++(d,p) level theory                     | S16 |
| Table S11. 1B Cartesian coordinates, energy (u.a.) and number of imaginary frequencies (NIMAG) for Transition State (TS2) associated to the departure of 4-Cl-BZS <sup>-</sup> anion from 8b with one explicit water molecule, calculated using B3LYP/6-31G++(d,p) level theory             | S17 |
| Table S12. Cartesian coordinates, energy (u.a.) and number of imaginary frequencies (NIMAG) for Transition State (TS2) associated to the departure of 4-NPO <sup>-</sup> anion from 8b with one explicit water molecule, calculated using B3LYP/6-31G++(d,p) level theory                   | S18 |
| <b>Table S13.</b> Cartesian coordinates, energy (u.a.) and number of imaginary frequencies (NIMAG) for Transition State (TS2) associated to the departure of 4-BZS <sup>-</sup> anion from <b>9a</b> with one explicit water molecule, calculated using B3LYP/6-31G++(d,p) level theory     | S20 |
| <b>Table S14.</b> Cartesian coordinates, energy (u.a.) and number of imaginary frequencies (NIMAG) for Transition State (TS2) associated to the departure of 4-NPO <sup>-</sup> anion from <b>9a</b> with one explicit water molecule, calculated using B3LYP/6-31G++(d,p) level theory     | S21 |
| <b>Table S15.</b> Cartesian coordinates, energy (u.a.) and number of imaginary frequencies (NIMAG) for Transition State (TS2) associated to the departure of 4-Cl-BZS <sup>-</sup> anion from <b>9b</b> with one explicit water molecule, calculated using B3LYP/6-31G++(d,p) level theory  | S22 |
| <b>Table S16.</b> 1A Cartesian coordinates, energy (u.a.) and number of imaginary frequencies (NIMAG) for Transition State (TS2) associated to the departure of 4NPO <sup>-</sup> anion from <b>9b</b> with one explicit water molecule, calculated using B3LYP/6-31G++(d,p) level theory   | S23 |
| <b>Table S17.</b> Cartesian coordinates, energy (u.a.) and number of imaginary frequencies (NIMAG) for Transition State (TS2) associated to the departure of BZS <sup>-</sup> anion from <b>8a</b> without explicit water molecules, calculated using B3LYP/6-31G++(d,p) level theory       | S25 |
| <b>Table S18.</b> Cartesian coordinates, energy (u.a.) and number of imaginary frequencies (NIMAG) for Transition State (TS2) associated to the departure of 4NPO <sup>-</sup> anion from <b>8a</b> without explicit water molecules, calculated using B3LYP/6-31G++(d,p) level theory      | S26 |
| <b>Table S19.</b> Cartesian coordinates, energy (u.a.) and number of imaginary frequencies (NIMAG) for Transition State (TS2) associated to the departure of 4-ClBZS <sup>-</sup> anion from <b>8b</b> , without explicit water molecules, calculated using B3LYP/6-31G++(d,p) level theory | S27 |
| <b>Table S20.</b> Cartesian coordinates, energy (u.a.) and number of imaginary frequencies (NIMAG) for Transition State (TS2) associated to the departure of 4NPO <sup>-</sup> anion from <b>8b</b> without explicit water molecules, calculated using B3LYP/6-31G++(d,p) level theory      | S28 |
| <b>Table S21.</b> Cartesian coordinates, energy (u.a.) and number of imaginary frequencies (NIMAG) for Transition State (TS2) associated to the departure of BZS <sup>-</sup> anion from <b>9a</b> without explicit water molecules, calculated using B3LYP/6-31G++(d,p) level theory       | S29 |
| <b>Table S22.</b> Cartesian coordinates, energy (u.a.) and number of imaginary frequencies (NIMAG) for Transition State (TS2) associated to the departure of 4NPO <sup>-</sup> anion from <b>9a</b>                                                                                         | S30 |

|                                                                                                                                                                                                                                                                                            |     |
|--------------------------------------------------------------------------------------------------------------------------------------------------------------------------------------------------------------------------------------------------------------------------------------------|-----|
| without explicit water molecules, calculated using B3LYP/6-31G++(d,p) level theory                                                                                                                                                                                                         |     |
| <b>Table S23.</b> Cartesian coordinates, energy (u.a.) and number of imaginary frequencies (NIMAG) for Transition State (TS2) associated to the departure of 4-CIBZS <sup>-</sup> anion from <b>9b</b> without explicit water molecules, calculated using B3LYP/6-31G++(d,p) level theory  | S32 |
| <b>Table S24.</b> Cartesian coordinates, energy (u.a.) and number of imaginary frequencies (NIMAG) for Transition State (TS2) associated to the departure of 4-NPO <sup>-</sup> anion from <b>9b</b> without explicit water molecules, calculated using B3LYP/6-31G++(d,p) level theory    | S33 |
| <b>Table S25.</b> Cartesian coordinates, energy (u.a.) and number of imaginary frequencies (NIMAG) for Transition State (TS2) associated to the departure of BZS <sup>-</sup> anion from <b>8a</b> with two explicit water molecule, calculated using B3LYP/6-31G++(d,p) level theory      | S35 |
| <b>Table S26.</b> Cartesian coordinates, energy (u.a.) and number of imaginary frequencies (NIMAG) for Transition State (TS2) associated to the departure of 4NPO <sup>-</sup> anion from <b>8a</b> with two explicit water molecule, calculated using B3LYP/6-31G++(d,p) level theory     | S36 |
| <b>Table S27.</b> Cartesian coordinates, energy (u.a.) and number of imaginary frequencies (NIMAG) for Transition State (TS2) associated to the departure of 4-Cl-BZS <sup>-</sup> anion from <b>8b</b> with two explicit water molecule, calculated using B3LYP/6-31G++(d,p) level theory | S38 |
| <b>Table S28.</b> Cartesian coordinates, energy (u.a.) and number of imaginary frequencies (NIMAG) for Transition State (TS2) associated to the departure of 4NPO <sup>-</sup> anion from <b>8b</b> with two explicit water molecule, calculated using B3LYP/6-31G++(d,p) level theory     | S39 |
| <b>Table S29.</b> Cartesian coordinates, energy (u.a.) and number of imaginary frequencies (NIMAG) for Transition State (TS2) associated to the departure of BZS <sup>-</sup> anion from <b>9a</b> with two explicit water molecule, calculated using B3LYP/6-31G++(d,p) level theory      | S41 |
| <b>Table S30.</b> Cartesian coordinates, energy (u.a.) and number of imaginary frequencies (NIMAG) for Transition State (TS2) associated to the departure of 4NPO <sup>-</sup> anion from <b>9b</b> with two explicit water molecule, calculated using B3LYP/6-31G++(d,p) level theory     | S42 |
| <b>Table S31.</b> Cartesian coordinates, energy (u.a.) and number of imaginary frequencies (NIMAG) for Transition State (TS2) associated to the departure of 4-Cl-BZS <sup>-</sup> anion from <b>9b</b> with two explicit water molecule, calculated using B3LYP/6-31G++(d,p) level theory | S43 |
| <b>Table S32.</b> Cartesian coordinates, energy (u.a.) and number of imaginary frequencies (NIMAG) for Transition State (TS2) associated to the departure of 4NPO <sup>-</sup> anion from <b>9b</b> with two explicit water molecule, calculated using B3LYP/6-31G++(d,p) level theory     | S45 |

Table S1. Experimental conditions and pseudo-first order rate constants ( $k_{obs}$ ) for the reaction of S-phenyl O-(4-nitrophenyl) dithiocarbonate (**1**) with SA-amines in aqueous ethanol 44 wt %, at 25 °C and ionic strength 0.2M (KCl).

| a) Piperidine        |                       |                      |                       |                     |                       |                      |                       |
|----------------------|-----------------------|----------------------|-----------------------|---------------------|-----------------------|----------------------|-----------------------|
| pH=9.5, $F_N=0.0457$ |                       | pH=10.52, $F_N=0.33$ |                       | pH=10.82, $F_N=0.5$ |                       | pH=11.12, $F_N=0.67$ |                       |
| $10^2 [N]_{Tot}/M$   | $10^2 k_{obs}/s^{-1}$ | $10^2 [N]_{Tot}/M$   | $10^2 k_{obs}/s^{-1}$ | $10^2 [N]_{Tot}/M$  | $10^2 k_{obs}/s^{-1}$ | $10^2 [N]_{Tot}/M$   | $10^2 k_{obs}/s^{-1}$ |
| 0.453                | 0.0448                | 0.392                | 0.297                 | 0.418               | 0.528                 | 0.363                | 0.776                 |
| 1.13                 | 0.106                 | 0.981                | 0.792                 | 1.05                | 1.32                  | 0.907                | 1.57                  |
| 1.81                 | 0.166                 | 1.57                 | 1.26                  | 1.67                | 2.07                  | 1.45                 | 2.48                  |
| 2.49                 | 0.235                 | 2.75                 | 2.39                  | 2.30                | 3.72                  | 2.00                 | 3.47                  |
| 3.17                 | 0.303                 | 3.33                 | 3.01                  | 2.95                | 3.75                  | 2.54                 | 4.74                  |
| 3.85                 | 0.394                 | 3.92                 | 3.41                  | 3.55                | 5.22                  | 3.08                 | 5.63                  |
| 4.53                 | 0.500                 |                      |                       | 4.18                | 6.04                  | 3.63                 | 6.36                  |

| b) Piperazine       |                       |                    |                       |                      |                       |
|---------------------|-----------------------|--------------------|-----------------------|----------------------|-----------------------|
| pH=9.41, $F_N=0.33$ |                       | pH=9.71, $F_N=0.5$ |                       | pH=10.01, $F_N=0.67$ |                       |
| $10^2 [N]_{Tot}/M$  | $10^2 k_{obs}/s^{-1}$ | $10^2 [N]_{Tot}/M$ | $10^2 k_{obs}/s^{-1}$ | $10^2 [N]_{Tot}/M$   | $10^2 k_{obs}/s^{-1}$ |
| 0.363               | 0.209                 | 0.471              | 0.337                 | 0.352                | 0.438                 |
| 0.908               | 0.545                 | 1.18               | 1.04                  | 0.879                | 1.17                  |
| 1.45                | 0.956                 | 1.88               | 1.77                  | 1.41                 | 2.05                  |
| 2.00                | 1.40                  | 2.59               | 2.76                  | 1.93                 | 2.83                  |
| 2.54                | 1.86                  | 3.30               | 3.51                  | 2.46                 | 3.70                  |
| 3.09                | 2.20                  | 4.01               | 3.78                  | 2.99                 | 4.45                  |

|      |      |      |      |      |      |
|------|------|------|------|------|------|
| 3.63 | 2.98 | 4.71 | 4.79 | 3.52 | 5.08 |
|------|------|------|------|------|------|

| c) 1-(2-Hydroxyethyl)piperazine |                       |                    |                       |                     |                       |
|---------------------------------|-----------------------|--------------------|-----------------------|---------------------|-----------------------|
| pH=8.79, $F_N=0.33$             |                       | pH=9.09, $F_N=0.5$ |                       | pH=9.39, $F_N=0.67$ |                       |
| $10^2 [N]_{Tot}/M$              | $10^3 k_{obs}/s^{-1}$ | $10^2 [N]_{Tot}/M$ | $10^3 k_{obs}/s^{-1}$ | $10^2 [N]_{Tot}/M$  | $10^2 k_{obs}/s^{-1}$ |
| 0.489                           | 0.348                 | 0.471              | 0.770                 | 0.471               | 0.116                 |
| 1.22                            | 1.38                  | 1.18               | 2.45                  | 1.18                | 0.426                 |
| 1.96                            | 3.08                  | 1.88               | 5.12                  | 1.88                | 0.791                 |
| 2.69                            | 5.21                  | 2.59               | 7.72                  | 2.59                | 1.17                  |
| 3.42                            | 6.37                  | 3.30               | 10.8                  | 3.30                | 1.64                  |
| 4.16                            | 8.23                  | 4.00               | 12.9                  | 4.00                | 1.83                  |
| 4.89                            | 10.9                  | 4.71               | 17.1                  | 4.71                | 2.28                  |

| d) Morpholine      |                       |                     |                       |
|--------------------|-----------------------|---------------------|-----------------------|
| pH=8.48, $F_N=0.5$ |                       | pH=9.08, $F_N=0.81$ |                       |
| $10^2 [N]_{Tot}/M$ | $10^3 k_{obs}/s^{-1}$ | $10^2 [N]_{Tot}/M$  | $10^2 k_{obs}/s^{-1}$ |
| 0.595              | 0.900                 | 0.550               | 0.179                 |
| 1.48               | 3.21                  | 1.38                | 0.635                 |
| 2.38               | 6.50                  | 2.20                | 1.36                  |
| 3.27               | 8.18                  | 3.03                | 1.41                  |
| 4.16               | 11.8                  | 3.85                | 2.06                  |
| 5.06               | 16.9                  | 4.68                | 2.70                  |
| 5.95               | 21.1                  | 5.50                | 3.27                  |

| e) Formylpiperazine |                       |                    |                       |                     |                       |
|---------------------|-----------------------|--------------------|-----------------------|---------------------|-----------------------|
| pH=7.33, $F_N=0.33$ |                       | pH=7.63, $F_N=0.5$ |                       | pH=7.93, $F_N=0.67$ |                       |
| $10^2 [N]_{Tot}/M$  | $10^3 k_{obs}/s^{-1}$ | $10^2 [N]_{Tot}/M$ | $10^3 k_{obs}/s^{-1}$ | $10^2 [N]_{Tot}/M$  | $10^3 k_{obs}/s^{-1}$ |
| 0.811               | 0.415                 | 0.728              | 0.347                 | 0.797               | 0.608                 |
| 2.03                | 0.568                 | 1.82               | 0.604                 | 1.99                | 1.22                  |
| 4.46                | 1.61                  | 2.91               | 1.45                  | 3.19                | 2.82                  |
| 5.67                | 2.26                  | 4.00               | 2.14                  | 4.38                | 4.18                  |
| 6.89                | 3.22                  | 5.10               | 3.50                  | 6.78                | 9.10                  |
| 8.11                | 4.04                  | 6.19               | 4.46                  | 7.97                | 10.7                  |
|                     |                       | 7.28               | 5.31                  |                     |                       |

Table S2. Experimental conditions and pseudo-first order rate constants ( $k_{obs}$ ) for the reaction of S-(4-chlorophenyl) O-(4-nitrophenyl) dithiocarbonate (**3**) with SA-amines in aqueous ethanol 44 wt %, at 25 °C and ionic strength 0.2M (KCl).

| a) Piperidine        |                       |                     |                       |                      |                       |
|----------------------|-----------------------|---------------------|-----------------------|----------------------|-----------------------|
| pH=10.52, $F_N=0.33$ |                       | pH=10.82, $F_N=0.5$ |                       | pH=11.12, $F_N=0.67$ |                       |
| $10^3 [N]_{Tot}/M$   | $10^2 k_{obs}/s^{-1}$ | $10^3 [N]_{Tot}/M$  | $10^2 k_{obs}/s^{-1}$ | $10^3 [N]_{Tot}/M$   | $10^2 k_{obs}/s^{-1}$ |
| 0.968                | 0.311                 | 0.930               | 0.327                 | 0.916                | 0.505                 |
| 2.42                 | 0.563                 | 2.33                | 0.600                 | 2.29                 | 1.03                  |
| 3.87                 | 0.933                 | 3.72                | 1.41                  | 3.66                 | 1.84                  |
| 5.32                 | 1.16                  | 5.12                | 1.89                  | 5.04                 | 2.32                  |
| 6.77                 | 1.69                  | 6.51                | 2.58                  | 6.41                 | 3.42                  |
| 8.23                 | 1.91                  | 7.91                | 3.15                  | 7.79                 | 3.61                  |
| 9.68                 | 2.21                  | 9.30                | 3.55                  | 9.16                 | 4.38                  |

| b) Piperazine       |                       |                    |                       |                      |                       |
|---------------------|-----------------------|--------------------|-----------------------|----------------------|-----------------------|
| pH=9.41, $F_N=0.33$ |                       | pH=9.71, $F_N=0.5$ |                       | pH=10.01, $F_N=0.67$ |                       |
| $10^3 [N]_{Tot}/M$  | $10^2 k_{obs}/s^{-1}$ | $10^3 [N]_{Tot}/M$ | $10^2 k_{obs}/s^{-1}$ | $10^3 [N]_{Tot}/M$   | $10^2 k_{obs}/s^{-1}$ |
| 0.820               | 0.218                 | 0.743              | 0.299                 | 1.76                 | 1.16                  |
| 2.05                | 0.545                 | 1.86               | 0.774                 | 2.81                 | 1.94                  |
| 3.28                | 1.11                  | 2.97               | 1.32                  | 3.87                 | 2.92                  |
| 4.51                | 1.53                  | 4.09               | 1.90                  | 4.92                 | 4.00                  |
| 5.74                | 1.93                  | 5.20               | 2.51                  | 5.98                 | 4.64                  |
| 6.97                | 2.49                  | 6.32               | 3.25                  | 7.04                 | 5.63                  |
| 8.20                | 2.94                  | 7.43               | 4.08                  |                      |                       |

| c) 1-(2-Hydroxyethyl)piperazine |                       |                    |                       |                     |                       |
|---------------------------------|-----------------------|--------------------|-----------------------|---------------------|-----------------------|
| pH=8.79, $F_N=0.33$             |                       | pH=9.09, $F_N=0.5$ |                       | pH=9.39, $F_N=0.67$ |                       |
| $10^3 [N]_{Tot}/M$              | $10^3 k_{obs}/s^{-1}$ | $10^3 [N]_{Tot}/M$ | $10^3 k_{obs}/s^{-1}$ | $10^3 [N]_{Tot}/M$  | $10^3 k_{obs}/s^{-1}$ |
| 0.972                           | 0.774                 | 0.793              | 0.888                 | 0.897               | 1.35                  |
| 2.43                            | 1.92                  | 1.98               | 2.23                  | 2.24                | 3.57                  |
| 3.89                            | 2.94                  | 3.17               | 3.91                  | 3.59                | 5.85                  |
| 5.35                            | 4.59                  | 4.36               | 4.73                  | 4.93                | 8.33                  |
| 6.81                            | 5.22                  | 5.55               | 6.48                  | 6.28                | 10.8                  |
| 8.27                            | 8.26                  | 6.74               | 7.63                  | 7.63                | 13.2                  |
| 9.72                            | 8.59                  | 7.93               | 9.73                  |                     |                       |

| d) Morpholine       |                       |                     |                       |                     |                       |
|---------------------|-----------------------|---------------------|-----------------------|---------------------|-----------------------|
| pH=8.18, $F_N=0.33$ |                       | pH=8.48, $F_N=0.50$ |                       | pH=8.78, $F_N=0.67$ |                       |
| $10^3 [N]_{Tot}/M$  | $10^3 k_{obs}/s^{-1}$ | $10^3 [N]_{Tot}/M$  | $10^3 k_{obs}/s^{-1}$ | $10^3 [N]_{Tot}/M$  | $10^3 k_{obs}/s^{-1}$ |
| 1.60                | 1.45                  | 1.42                | 1.98                  | 1.38                | 2.76                  |
| 4.00                | 3.77                  | 3.56                | 5.62                  | 3.44                | 7.63                  |
| 6.40                | 6.18                  | 5.69                | 9.83                  | 5.51                | 13.5                  |
| 8.80                | 8.74                  | 7.83                | 13.7                  | 7.58                | 18.9                  |
| 11.2                | 11.9                  | 9.93                | 17.8                  | 9.64                | 25.5                  |
| 13.6                | 15.4                  | 12.1                | 22.6                  | 11.7                | 30.3                  |
| 16.0                | 19.1                  | 14.2                | 28.1                  |                     |                       |



| e) Formylpiperazine |                       |                    |                       |                     |                       |
|---------------------|-----------------------|--------------------|-----------------------|---------------------|-----------------------|
| pH=7.33, $F_N=0.33$ |                       | pH=7.63, $F_N=0.5$ |                       | pH=7.93, $F_N=0.67$ |                       |
| $10^3 [N]_{Tot}/M$  | $10^3 k_{obs}/s^{-1}$ | $10^3 [N]_{Tot}/M$ | $10^3 k_{obs}/s^{-1}$ | $10^3 [N]_{Tot}/M$  | $10^3 k_{obs}/s^{-1}$ |
| 1.37                | 0.374                 | 1.24               | 0.476                 | 1.25                | 0.722                 |
| 3.43                | 0.986                 | 3.11               | 1.28                  | 3.14                | 1.62                  |
| 5.48                | 1.53                  | 4.98               | 2.05                  | 5.02                | 2.54                  |
| 7.54                | 2.12                  | 6.84               | 2.92                  | 6.90                | 3.89                  |
| 9.59                | 2.83                  | 8.71               | 3.79                  | 8.78                | 5.00                  |
| 11.6                | 3.46                  | 10.6               | 4.68                  | 10.7                | 6.28                  |
| 13.7                | 4.27                  | 12.4               | 5.44                  | 12.5                | 7.71                  |

| f) Piperazine + piperazinium Ion |                       |                    |                       |                    |                       |                    |                       |                    |                       |
|----------------------------------|-----------------------|--------------------|-----------------------|--------------------|-----------------------|--------------------|-----------------------|--------------------|-----------------------|
| pH=7.75                          |                       | pH=8.00            |                       | pH=8.25            |                       | pH=8.5             |                       | pH=9.00            |                       |
| $F_N=0.00634277$                 |                       | $F_N=0.01127966$   |                       | $F_N=0.01993791$   |                       | $F_N=0.0349682$    |                       | $F_N=0.10293459$   |                       |
| (piperazine)                     |                       | (piperazine)       |                       | (piperazine)       |                       | (piperazine)       |                       | (piperazine)       |                       |
| $F_N=0.98237803$                 |                       | $F_N=0.98242011$   |                       | $F_N=0.97651657$   |                       | $F_N=0.96310733$   |                       | $F_N=0.89652561$   |                       |
| (piperazinium ion)               |                       | (piperazinium ion) |                       | (piperazinium ion) |                       | (piperazinium ion) |                       | (piperazinium ion) |                       |
| $10^3 [N]_{Tot}/M$               | $10^3 k_{obs}/s^{-1}$ | $10^3 [N]_{Tot}/M$ | $10^3 k_{obs}/s^{-1}$ | $10^3 [N]_{Tot}/M$ | $10^3 k_{obs}/s^{-1}$ | $10^3 [N]_{Tot}/M$ | $10^2 k_{obs}/s^{-1}$ | $10^3 [N]_{Tot}/M$ | $10^2 k_{obs}/s^{-1}$ |
| 5.05                             | 2.92                  | 4.93               | 3.14                  | 4.87               | 3.90                  | 4.89               | 5.43                  | 4.86               | 1.14                  |
| 6.95                             | 3.98                  | 6.78               | 4.32                  | 6.69               | 5.26                  | 6.72               | 7.16                  | 6.68               | 1.36                  |

|      |      |      |      |      |      |      |      |      |      |
|------|------|------|------|------|------|------|------|------|------|
| 8.84 | 5.00 | 8.63 | 4.93 | 8.52 | 6.99 | 8.55 | 8.93 | 8.50 | 1.82 |
| 10.7 | 5.68 | 10.5 | 6.41 | 10.3 | 8.29 | 10.4 | 11.0 | 10.3 | 2.15 |
| 12.6 | 7.08 | 12.3 | 7.33 | 12.2 | 10.1 | 12.2 | 13.5 | 12.1 | 2.56 |

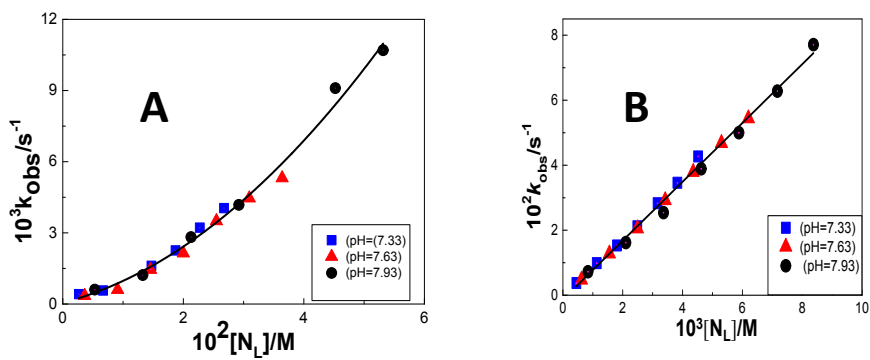

**Figure S1:** Plot of  $k_{obs}$  vs. free Formylpiperazine concentration, for the reactions of **1** (A) and **2** (B)

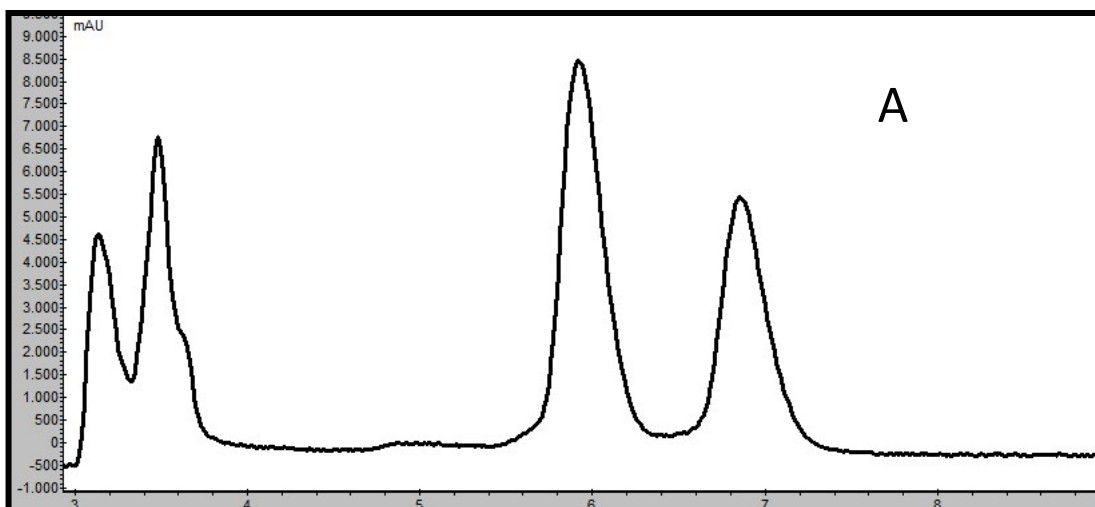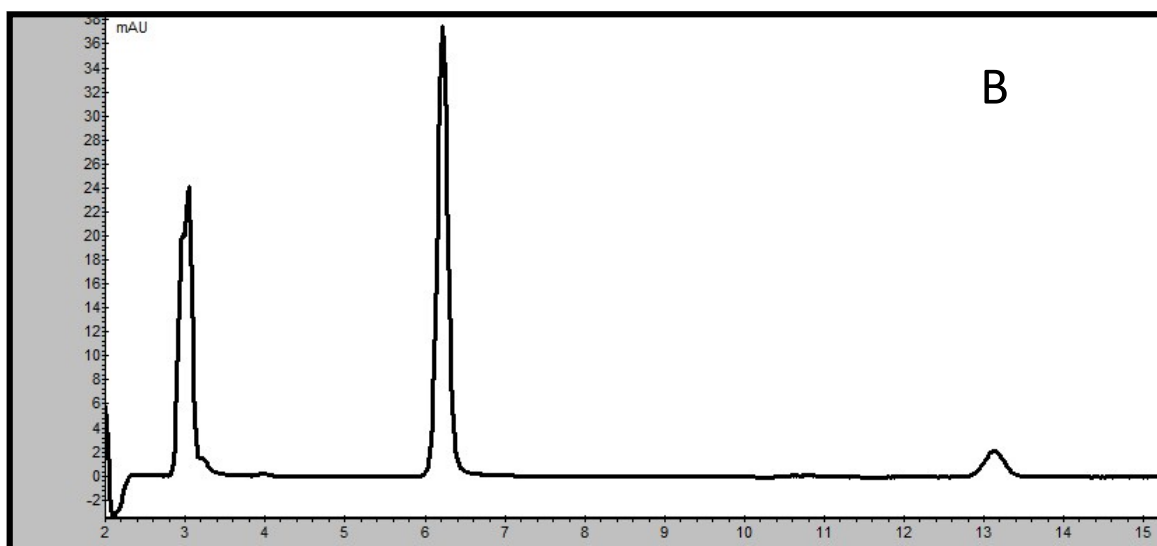

**Figure S2.** HPLC analysis of the reaction of **1**(A) and **3**(B) with excess of morpholine at wavelength 290 nm. The number are defined in Scheme 1 in the manuscript.

**Table S3.** Energy gap (kcal mol<sup>-1</sup>) of intermediate T- and the corresponding TS for the reaction of compounds **1**, **2**, **3** and **4** with morpholine, assisted by zero, one and two explicit water molecules with ethanol as implicit solvent.

| Explicit Water | Intermediate | Nucleofuge           |        |         | Theoretical prediction | Experimetal results |
|----------------|--------------|----------------------|--------|---------|------------------------|---------------------|
|                |              | O-Ph-NO <sub>2</sub> | S-Ph-H | S-Ph-Cl | O-Ph-NO <sub>2</sub>   |                     |
| 0              | 8a           | 9.27                 | 7.11   | ----    | 10%                    | 56%                 |
|                | 8b           | 9.54                 | ----   | 6.97    | 7.6%                   | 47%                 |
|                | 9a           | 11.05                | 9.24   | ----    | 16%                    | 100%                |
|                | 9b           | 11.82                | ----   | 10.38   | 24%                    | 100%                |
| 1              | 8a           | 5.12                 | 5.18   | ----    | 52%                    | 56%                 |
|                | 8b           | 5.61                 | ----   | 5.60    | 51%                    | 47%                 |
|                | 9a           | 4.65                 | 19.29  | ----    | 100%                   | 100%                |
|                | 9b           | 4.78                 | ----   | 18.71   | 100%                   | 100%                |
| 2              | 8a           | 4.18                 | 5.39   | ----    | 77%                    | 56%                 |
|                | 8b           | 3.87                 | ----   | 5.49    | 83%                    | 47%                 |
|                | 9a           | 3.23                 | 9.45   | ----    | 100%                   | 100%                |
|                | 9b           | 3.12                 | ----   | 9.60    | 100%                   | 100%                |

Table S4. Energy gap (kcal mol<sup>-1</sup>) of intermediate T± and the corresponding TS for the reaction of compounds **1**, **2**, **3** and **4** with morpholine, assisted by zero, one and two explicit water molecules with ethanol as implicit solvent.

| Explicit Water | Intermediate | Nucleofuge           |        |         | Theoretical prediction% | Experimetal results% |
|----------------|--------------|----------------------|--------|---------|-------------------------|----------------------|
|                |              | O-Ph-NO <sub>2</sub> | S-Ph-H | S-Ph-Cl | O-Ph-NO <sub>2</sub>    |                      |
| 0              | 6a           | 15.58                | 15.26  | ----    | 15%                     | 56%                  |
|                | 6b           | 14.21                | ----   | 13.69   | 35%                     | 47%                  |
|                | 7a           | 19.65                | 17.29  | ----    | 8%                      | 100%                 |
|                | 7b           | 20.48                | ----   | 18.42   | 8%                      | 100%                 |
| 1              | 6a           | 5.12                 | 5.18   | ----    | 64%                     | 56%                  |
|                | 6b           | 5.61                 | ----   | 5.60    | 5%                      | 47%                  |
|                | 7a           | 4.65                 | 19.29  | ----    | 98%                     | 100%                 |
|                | 7b           | 4.78                 | ----   | 18.71   | 98%                     | 100%                 |
| 2              | 6a           | 5.12                 | 5.18   | ----    | 64%                     | 56%                  |
|                | 6b           | 5.61                 | ----   | 5.60    | 5%                      | 47%                  |
|                | 7a           | 4.65                 | 19.29  | ----    | 98%                     | 100%                 |
|                | 7b           | 4.78                 | ----   | 18.71   | 98%                     | 100%                 |

Table S5. Natural atomic charges over reactive center for the T- and TS, for the intermediate 8a.

|                       | S <sup>1</sup> | C <sup>1</sup> | S      | O      | N      |
|-----------------------|----------------|----------------|--------|--------|--------|
| Intermediate          | -0,511         | 0,159          | 0,193  | -0,582 | -0,588 |
| Expelling<br>S-Ph-H   | -0,418         | 0,331          | -0,148 | -0,556 | -0,568 |
| Expelling<br>O-Ph-NO2 | 0,099          | -0,111         | 0,311  | -0,732 | -0,51  |

<sup>1</sup>Corresponds to sulfur and carbon atoms in thiocarbonyl group

Table S6. Natural atomic charges over reactive center for the T- and TS, for the intermediate 8b

|                       | S <sup>1</sup> | C <sup>1</sup> | S      | O      | N      |
|-----------------------|----------------|----------------|--------|--------|--------|
| Intermediate          | -0,509         | 0,159          | 0,196  | -0,582 | -0,588 |
| Expelling<br>S-Ph-Cl  | -0,401         | 0,346          | -0,168 | -0,552 | -0,557 |
| Expelling<br>O-Ph-NO2 | 0,101          | -0,113         | 0,316  | -0,733 | -0,509 |

<sup>1</sup>Corresponds to sulfur and carbon atoms in thiocarbonyl group

Table S7. Natural atomic charges over reactive center for the T- and TS, for the intermediate 9a

|                       | O <sup>1</sup> | C <sup>1</sup> | S      | O      | N      |
|-----------------------|----------------|----------------|--------|--------|--------|
| Intermediate          | -0.827         | 0.600          | 0.113  | -0.581 | 0.594  |
| Expelling<br>S-Ph-Cl  | -0.813         | 0.783          | -0.187 | -0,555 | -0,574 |
| Expelling<br>O-Ph-NO2 | -0.651         | 0.584          | 0.269  | -0.599 | -0.527 |

<sup>1</sup>Corresponds to oxygen and carbon atoms in carbonyl group

Table S8. Natural atomic charges over reactive center for the T- and TS, for the intermediate 9b

|                       | O <sup>1</sup> | C <sup>1</sup> | S      | O      | N      |
|-----------------------|----------------|----------------|--------|--------|--------|
| Intermediate          | -0.827         | 0.600          | 0.166  | -0.582 | -0.595 |
| Expelling<br>S-Ph-H   | -0.802         | 0.784          | -0,184 | -0,555 | -0,574 |
| Expelling<br>O-Ph-NO2 | -0.649         | 0.582          | 0.274  | -0.734 | -0.526 |

<sup>1</sup>Corresponds to oxygen and carbon atoms in carbonyl group

**Table S9.** 1B Cartesian coordinates, energy (u.a.) and number of imaginary frequencies (NIMAG) for Transition State (TS2) associated to the departure of 4BZS<sup>-</sup> anion from **8a** with one explicit water molecule, calculated using B3LYP/6-31G++(d,p) level theory

-----

| Center<br>Number | Atomic<br>Number | Atomic<br>Type | Coordinates (Angstroms) |           |           |
|------------------|------------------|----------------|-------------------------|-----------|-----------|
|                  |                  |                | X                       | Y         | Z         |
| 1                | 6                | 0              | -0.344656               | 0.526302  | 0.599708  |
| 2                | 8                | 0              | 0.751213                | 1.100684  | -0.028732 |
| 3                | 6                | 0              | -2.199650               | 1.883185  | 1.529096  |
| 4                | 6                | 0              | -1.424429               | 2.260316  | -0.744511 |
| 5                | 6                | 0              | -3.586503               | 2.279652  | 1.057093  |
| 6                | 1                | 0              | -1.702254               | 2.751094  | 1.967633  |
| 7                | 1                | 0              | -2.276491               | 1.124601  | 2.288802  |
| 8                | 6                | 0              | -2.847684               | 2.652282  | -1.106248 |
| 9                | 1                | 0              | -0.843773               | 3.160125  | -0.534197 |
| 10               | 1                | 0              | -0.972387               | 1.753784  | -1.584255 |
| 11               | 1                | 0              | -4.123441               | 2.769072  | 1.861518  |
| 12               | 1                | 0              | -4.140956               | 1.393652  | 0.753207  |
| 13               | 1                | 0              | -2.834935               | 3.415731  | -1.876077 |
| 14               | 1                | 0              | -3.385007               | 1.784877  | -1.482391 |
| 15               | 7                | 0              | -1.425417               | 1.372503  | 0.406889  |
| 16               | 8                | 0              | -3.532738               | 3.192718  | -0.008628 |
| 17               | 6                | 0              | -2.469843               | -1.416285 | -0.779770 |
| 18               | 6                | 0              | -3.331866               | -1.255859 | -1.866364 |
| 19               | 6                | 0              | -3.011918               | -1.867849 | 0.425682  |
| 20               | 6                | 0              | -4.686227               | -1.537245 | -1.756561 |
| 21               | 1                | 0              | -2.929987               | -0.911650 | -2.802548 |
| 22               | 6                | 0              | -4.368400               | -2.135329 | 0.537926  |
| 23               | 1                | 0              | -2.367227               | -2.001420 | 1.273395  |
| 24               | 6                | 0              | -5.214819               | -1.975222 | -0.550913 |
| 25               | 1                | 0              | -5.327202               | -1.409685 | -2.612853 |
| 26               | 1                | 0              | -4.761882               | -2.479376 | 1.479535  |
| 27               | 6                | 0              | 2.021091                | 0.667936  | -0.052240 |
| 28               | 6                | 0              | 2.957259                | 1.677516  | -0.287768 |
| 29               | 6                | 0              | 2.437596                | -0.654176 | 0.066476  |
| 30               | 6                | 0              | 4.295903                | 1.380511  | -0.402569 |
| 31               | 1                | 0              | 2.609331                | 2.689610  | -0.372239 |
| 32               | 6                | 0              | 3.781948                | -0.952266 | -0.048242 |
| 33               | 1                | 0              | 1.736546                | -1.436313 | 0.254082  |
| 34               | 6                | 0              | 4.700292                | 0.058970  | -0.281095 |
| 35               | 1                | 0              | 5.018202                | 2.151997  | -0.579973 |
| 36               | 1                | 0              | 4.112363                | -1.967668 | 0.043311  |
| 37               | 7                | 0              | 6.106933                | -0.264301 | -0.401382 |
| 38               | 8                | 0              | 6.877389                | 0.633391  | -0.604881 |
| 39               | 8                | 0              | 6.437313                | -1.410170 | -0.294167 |
| 40               | 16               | 0              | -0.737720               | -1.088177 | -0.964905 |
| 41               | 8                | 0              | 0.466260                | -3.640066 | 1.291566  |
| 42               | 1                | 0              | 0.094866                | -3.392141 | 0.456717  |
| 43               | 1                | 0              | 0.391094                | -2.849443 | 1.810662  |
| 44               | 1                | 0              | -6.265750               | -2.191014 | -0.461888 |

45 16 0 -0.077641 -0.204344 2.164878

-----  
Total Energy (a.u.) = -2077.995253 ; NIMAG = i148.47

**Table S10.** Cartesian coordinates, energy (u.a.) and number of imaginary frequencies (NIMAG) for Transition State (TS2) associated to the departure of 4NPO<sup>-</sup> anion from **8a** with one explicit water molecule, calculated using B3LYP/6-31G++(d,p) level theory

-----

| Center<br>Number | Atomic<br>Number | Atomic<br>Type | Coordinates (Angstroms) |           |           |
|------------------|------------------|----------------|-------------------------|-----------|-----------|
|                  |                  |                | X                       | Y         | Z         |
| 1                | 6                | 0              | -0.137740               | 0.897150  | 0.145499  |
| 2                | 8                | 0              | 1.862016                | 1.348160  | -0.897366 |
| 3                | 6                | 0              | -0.600676               | 3.015411  | 1.234757  |
| 4                | 6                | 0              | -0.879815               | 2.901189  | -1.165788 |
| 5                | 6                | 0              | -1.728864               | 4.039560  | 1.285857  |
| 6                | 1                | 0              | 0.372274                | 3.529286  | 1.165560  |
| 7                | 1                | 0              | -0.601077               | 2.405588  | 2.140752  |
| 8                | 6                | 0              | -2.008670               | 3.922160  | -1.046009 |
| 9                | 1                | 0              | 0.071777                | 3.415856  | -1.365687 |
| 10               | 1                | 0              | -1.081713               | 2.218731  | -1.994261 |
| 11               | 1                | 0              | -1.551125               | 4.767400  | 2.083687  |
| 12               | 1                | 0              | -2.685620               | 3.526525  | 1.477546  |
| 13               | 1                | 0              | -2.036436               | 4.567991  | -1.929423 |
| 14               | 1                | 0              | -2.975899               | 3.400371  | -0.956641 |
| 15               | 7                | 0              | -0.805458               | 2.137900  | 0.077609  |
| 16               | 8                | 0              | -1.826459               | 4.790686  | 0.074414  |
| 17               | 6                | 0              | -2.258181               | -0.997929 | -0.737576 |
| 18               | 6                | 0              | -2.992140               | -1.773471 | -1.658216 |
| 19               | 6                | 0              | -2.777768               | -0.851730 | 0.562370  |
| 20               | 6                | 0              | -4.202287               | -2.371276 | -1.307074 |
| 21               | 1                | 0              | -2.607790               | -1.910954 | -2.665193 |
| 22               | 6                | 0              | -3.991828               | -1.444590 | 0.919220  |
| 23               | 1                | 0              | -2.218681               | -0.299911 | 1.307815  |
| 24               | 6                | 0              | -4.699892               | -2.196834 | -0.015871 |
| 25               | 1                | 0              | -4.753858               | -2.964241 | -2.029354 |
| 26               | 1                | 0              | -4.376433               | -1.327082 | 1.927874  |
| 27               | 6                | 0              | 2.925371                | 0.593764  | -0.710119 |
| 28               | 6                | 0              | 4.201677                | 1.155838  | -1.009867 |
| 29               | 6                | 0              | 2.891250                | -0.757584 | -0.253265 |
| 30               | 6                | 0              | 5.365706                | 0.420366  | -0.884937 |
| 31               | 1                | 0              | 4.231504                | 2.185909  | -1.351063 |
| 32               | 6                | 0              | 4.060022                | -1.489787 | -0.125157 |
| 33               | 1                | 0              | 1.938399                | -1.212939 | -0.024600 |

-----



|    |    |   |           |           |           |
|----|----|---|-----------|-----------|-----------|
| 34 | 6  | 0 | 5.299925  | -0.911213 | -0.439210 |
| 35 | 1  | 0 | 6.330465  | 0.852800  | -1.122078 |
| 36 | 1  | 0 | 4.029926  | -2.520280 | 0.209642  |
| 37 | 7  | 0 | 6.507512  | -1.684264 | -0.307281 |
| 38 | 8  | 0 | 7.592102  | -1.156462 | -0.615060 |
| 39 | 8  | 0 | 6.427089  | -2.855561 | 0.103702  |
| 40 | 16 | 0 | -0.730709 | -0.298369 | -1.318285 |
| 41 | 8  | 0 | 3.238649  | 0.989802  | 2.476086  |
| 42 | 1  | 0 | 3.327285  | 1.063668  | 1.517053  |
| 43 | 1  | 0 | 2.266613  | 1.015426  | 2.625633  |
| 44 | 1  | 0 | -5.632376 | -2.644013 | 0.258727  |
| 45 | 16 | 0 | 0.069307  | 0.218138  | 1.541810  |

-----  
Total Energy (a.u.) = -2077.995348 ; **NIMAG = i149.19**

**Table S11.** 1B Cartesian coordinates, energy (u.a.) and number of imaginary frequencies (NIMAG) for Transition State (TS2) associated to the departure of 4-Cl-BZS<sup>-</sup> anion from **8b** with one explicit water molecule, calculated using B3LYP/6-31G++(d,p) level theory

| Center Number | Atomic Number | Atomic Type | Coordinates (Angstroms) |           |           |
|---------------|---------------|-------------|-------------------------|-----------|-----------|
|               |               |             | X                       | Y         | Z         |
| 1             | 6             | 0           | 0.229940                | 0.689815  | 0.610059  |
| 2             | 8             | 0           | 1.366358                | 1.142935  | -0.044934 |
| 3             | 6             | 0           | -1.474302               | 2.237767  | 1.529461  |
| 4             | 6             | 0           | -0.699236               | 2.488378  | -0.761598 |
| 5             | 6             | 0           | -2.823795               | 2.753974  | 1.064990  |
| 6             | 1             | 0           | -0.890492               | 3.063897  | 1.941359  |
| 7             | 1             | 0           | -1.612038               | 1.507132  | 2.307733  |
| 8             | 6             | 0           | -2.083819               | 3.006039  | -1.115297 |
| 9             | 1             | 0           | -0.032773               | 3.333217  | -0.579600 |
| 10            | 1             | 0           | -0.309381               | 1.922423  | -1.594541 |
| 11            | 1             | 0           | -3.300282               | 3.310202  | 1.864054  |
| 12            | 1             | 0           | -3.464198               | 1.918288  | 0.788811  |
| 13            | 1             | 0           | -2.009560               | 3.747399  | -1.903030 |
| 14            | 1             | 0           | -2.706434               | 2.185611  | -1.464353 |
| 15            | 7             | 0           | -0.768167               | 1.630658  | 0.410366  |
| 16            | 8             | 0           | -2.698711               | 3.633709  | -0.022558 |
| 17            | 6             | 0           | -2.089651               | -1.071700 | -0.697451 |
| 18            | 6             | 0           | -2.947929               | -0.854164 | -1.777055 |
| 19            | 6             | 0           | -2.654945               | -1.442483 | 0.524774  |
| 20            | 6             | 0           | -4.321195               | -1.002648 | -1.644315 |
| 21            | 1             | 0           | -2.528546               | -0.570839 | -2.725881 |
| 22            | 6             | 0           | -4.028967               | -1.576871 | 0.659650  |

|    |    |   |           |           |           |
|----|----|---|-----------|-----------|-----------|
| 23 | 1  | 0 | -2.013847 | -1.617917 | 1.367567  |
| 24 | 6  | 0 | -4.871775 | -1.361189 | -0.422378 |
| 25 | 1  | 0 | -4.959288 | -0.833742 | -2.495588 |
| 26 | 1  | 0 | -4.439899 | -1.860714 | 1.613795  |
| 27 | 6  | 0 | 2.588909  | 0.590697  | -0.073532 |
| 28 | 6  | 0 | 3.613315  | 1.500929  | -0.344098 |
| 29 | 6  | 0 | 2.879557  | -0.762111 | 0.071328  |
| 30 | 6  | 0 | 4.915910  | 1.075187  | -0.467991 |
| 31 | 1  | 0 | 3.361958  | 2.539436  | -0.448234 |
| 32 | 6  | 0 | 4.187732  | -1.189475 | -0.052525 |
| 33 | 1  | 0 | 2.110109  | -1.469474 | 0.285785  |
| 34 | 6  | 0 | 5.194592  | -0.275837 | -0.320241 |
| 35 | 1  | 0 | 5.705643  | 1.770153  | -0.672254 |
| 36 | 1  | 0 | 4.421444  | -2.229447 | 0.058980  |
| 37 | 7  | 0 | 6.562296  | -0.734322 | -0.449818 |
| 38 | 8  | 0 | 7.411582  | 0.081070  | -0.683727 |
| 39 | 8  | 0 | 6.783799  | -1.903782 | -0.319576 |
| 40 | 16 | 0 | -0.337005 | -0.914411 | -0.911154 |
| 41 | 8  | 0 | 0.651093  | -3.518370 | 1.390243  |
| 42 | 1  | 0 | 0.293077  | -3.254894 | 0.554314  |
| 43 | 1  | 0 | 0.658795  | -2.712778 | 1.891400  |
| 44 | 16 | 0 | 0.448602  | -0.027791 | 2.188706  |
| 45 | 17 | 0 | -6.613399 | -1.545262 | -0.247839 |

-----  
Total Energy (a.u.) = -2073.994583 ; **NIMAG = i148.30**

**Table S12.** Cartesian coordinates, energy (u.a.) and number of imaginary frequencies (NIMAG) for Transition State (TS2) associated to the departure of 4-NPO<sup>-</sup> anion from **8b** with one explicit water molecule, calculated using B3LYP/6-31G++(d,p) level theory

| Center Number | Atomic Number | Atomic Type | Coordinates (Angstroms) |         |          |
|---------------|---------------|-------------|-------------------------|---------|----------|
|               |               |             | X                       | Y       | Z        |
| 1             | 6             | 0           | -0.95396                | 0.41616 | 0.1752   |
| 2             | 8             | 0           | 0.95361                 | 1.06773 | -0.95174 |
| 3             | 6             | 0           | -1.79085                | 2.54801 | 0.97687  |
| 4             | 6             | 0           | -2.02278                | 2.06473 | -1.38242 |
| 5             | 6             | 0           | -3.0813                 | 3.35673 | 0.90616  |
| 6             | 1             | 0           | -0.92223                | 3.20989 | 0.82548  |
| 7             | 1             | 0           | -1.69315                | 2.07507 | 1.95641  |
| 8             | 6             | 0           | -3.31399                | 2.87948 | -1.38464 |
| 9             | 1             | 0           | -1.17409                | 2.70605 | -1.66311 |

|    |    |   |          |          |          |
|----|----|---|----------|----------|----------|
| 10 | 1  | 0 | -2.09421 | 1.25229  | -2.10886 |
| 11 | 1  | 0 | -3.0413  | 4.20509  | 1.5965   |
| 12 | 1  | 0 | -3.93528 | 2.71499  | 1.17857  |
| 13 | 1  | 0 | -3.44593 | 3.38565  | -2.34623 |
| 14 | 1  | 0 | -4.17578 | 2.21369  | -1.21229 |
| 15 | 7  | 0 | -1.82785 | 1.50058  | -0.04903 |
| 16 | 8  | 0 | -3.29729 | 3.90926  | -0.3936  |
| 17 | 6  | 0 | -2.70135 | -1.91665 | -0.42062 |
| 18 | 6  | 0 | -3.24462 | -2.96176 | -1.19543 |
| 19 | 6  | 0 | -3.28558 | -1.65333 | 0.83259  |
| 20 | 6  | 0 | -4.33436 | -3.7096  | -0.75009 |
| 21 | 1  | 0 | -2.80536 | -3.19261 | -2.16207 |
| 22 | 6  | 0 | -4.38029 | -2.39616 | 1.28268  |
| 23 | 1  | 0 | -2.8661  | -0.8874  | 1.47303  |
| 24 | 6  | 0 | -4.90195 | -3.41628 | 0.48969  |
| 25 | 1  | 0 | -4.73965 | -4.50997 | -1.36056 |
| 26 | 1  | 0 | -4.81615 | -2.18439 | 2.25443  |
| 27 | 6  | 0 | 2.13075  | 0.54284  | -0.68014 |
| 28 | 6  | 0 | 3.29179  | 1.27369  | -1.07075 |
| 29 | 6  | 0 | 2.32931  | -0.71971 | -0.04565 |
| 30 | 6  | 0 | 4.56532  | 0.77649  | -0.86487 |
| 31 | 1  | 0 | 3.14413  | 2.23769  | -1.54747 |
| 32 | 6  | 0 | 3.60691  | -1.21246 | 0.16287  |
| 33 | 1  | 0 | 1.46872  | -1.29953 | 0.25561  |
| 34 | 6  | 0 | 4.72936  | -0.4738  | -0.24362 |
| 35 | 1  | 0 | 5.44173  | 1.33491  | -1.17162 |
| 36 | 1  | 0 | 3.75444  | -2.17778 | 0.63331  |
| 37 | 7  | 0 | 6.05229  | -0.9991  | -0.02638 |
| 38 | 8  | 0 | 7.03065  | -0.33625 | -0.41762 |
| 39 | 8  | 0 | 6.17419  | -2.10029 | 0.53916  |
| 40 | 16 | 0 | -1.31068 | -1.04921 | -1.10862 |
| 41 | 8  | 0 | 2.33568  | 1.411384 | 2.42162  |
| 42 | 1  | 0 | 2.36653  | 1.39631  | 1.45628  |
| 43 | 1  | 0 | 1.43336  | 1.08146  | 2.63372  |
| 44 | 1  | 0 | -0.70543 | 0.06414  | 1.35752  |
| 45 | 17 | 0 | -6.2875  | -4.3416  | 1.05682  |

-----  
Total Energy (a.u.) = -2073.994567 ; **NIMAG = i149.54**

**Table S13.** Cartesian coordinates, energy (u.a.) and number of imaginary frequencies (NIMAG) for Transition State (TS2) associated to the departure of 4-BZS<sup>-</sup> anion from **9a** with one explicit water molecule, calculated using B3LYP/6-31G++(d,p) level theory

-----

| Center<br>Number | Atomic<br>Number | Atomic<br>Type | Coordinates (Angstroms) |           |           |
|------------------|------------------|----------------|-------------------------|-----------|-----------|
|                  |                  |                | X                       | Y         | Z         |
| 1                | 6                | 0              | -0.345667               | 0.522692  | 0.690858  |
| 2                | 8                | 0              | 0.749917                | 1.088090  | 0.053834  |
| 3                | 6                | 0              | -2.200482               | 1.892608  | 1.601292  |
| 4                | 6                | 0              | -1.426104               | 2.237081  | -0.677779 |
| 5                | 6                | 0              | -3.587545               | 2.282101  | 1.124127  |
| 6                | 1                | 0              | -1.703026               | 2.766787  | 2.027124  |
| 7                | 1                | 0              | -2.276972               | 1.145021  | 2.371857  |
| 8                | 6                | 0              | -2.849530               | 2.623655  | -1.044611 |
| 9                | 1                | 0              | -0.845472               | 3.139882  | -0.480634 |
| 10               | 1                | 0              | -0.974303               | 1.718570  | -1.510311 |
| 11               | 1                | 0              | -4.124252               | 2.782984  | 1.921620  |
| 12               | 1                | 0              | -4.142008               | 1.391764  | 0.833212  |
| 13               | 1                | 0              | -2.837136               | 3.375954  | -1.825346 |
| 14               | 1                | 0              | -3.386890               | 1.750873  | -1.408049 |
| 15               | 7                | 0              | -1.426589               | 1.365919  | 0.486272  |
| 16               | 8                | 0              | -3.534255               | 3.179750  | 0.045365  |
| 17               | 6                | 0              | -2.471128               | -1.439756 | -0.659784 |
| 18               | 6                | 0              | -3.333552               | -1.295065 | -1.748268 |
| 19               | 6                | 0              | -3.012728               | -1.873993 | 0.552230  |
| 20               | 6                | 0              | -4.687843               | -1.574984 | -1.633949 |
| 21               | 1                | 0              | -2.932041               | -0.964315 | -2.689448 |
| 22               | 6                | 0              | -4.369141               | -2.139972 | 0.668790  |
| 23               | 1                | 0              | -2.367724               | -1.995290 | 1.401548  |
| 24               | 6                | 0              | -5.215962               | -1.995630 | -0.421939 |
| 25               | 1                | 0              | -5.329134               | -1.459820 | -2.491760 |
| 26               | 1                | 0              | -4.762254               | -2.470482 | 1.615389  |
| 27               | 6                | 0              | 2.019834                | 0.655181  | 0.036102  |
| 28               | 6                | 0              | 2.955808                | 1.661367  | -0.214253 |
| 29               | 6                | 0              | 2.436526                | -0.665043 | 0.173674  |
| 30               | 6                | 0              | 4.294444                | 1.362882  | -0.325245 |
| 31               | 1                | 0              | 2.607740                | 2.672105  | -0.313149 |
| 32               | 6                | 0              | 3.780870                | -0.964612 | 0.062779  |
| 33               | 1                | 0              | 1.735627                | -1.444474 | 0.372758  |
| 34               | 6                | 0              | 4.699021                | 0.043267  | -0.184920 |
| 35               | 1                | 0              | 5.016596                | 2.131812  | -0.513983 |
| 36               | 1                | 0              | 4.111428                | -1.978557 | 0.168809  |
| 37               | 7                | 0              | 6.105655                | -0.281554 | -0.301043 |
| 38               | 8                | 0              | 6.875941                | 0.613198  | -0.517705 |
| 39               | 8                | 0              | 6.436198                | -1.425728 | -0.177476 |
| 40               | 16               | 0              | -0.739106               | -1.114164 | -0.850233 |
| 41               | 8                | 0              | 0.465949                | -3.633210 | 1.442281  |
| 42               | 1                | 0              | 0.094233                | -3.397356 | 0.604084  |
| 43               | 1                | 0              | 0.390879                | -2.835210 | 1.949978  |
| 44               | 8                | 0              | -0.126689               | -0.056590 | 1.979804  |

45      1      0      -6.260450   -2.208925   -0.330010

-----  
 Total Energy (a.u.) = -2154.411390; **NIMAG = i147.11**

**Table S14.** Cartesian coordinates, energy (u.a.) and number of imaginary frequencies (NIMAG) for Transition State (TS2) associated to the departure of 4-NPO<sup>-</sup> anion from **9a** with one explicit water molecule, calculated using B3LYP/6-31G++(d,p) level theory

| Center Number | Atomic Number | Atomic Type | Coordinates (Angstroms) |           |           |
|---------------|---------------|-------------|-------------------------|-----------|-----------|
|               |               |             | X                       | Y         | Z         |
| 1             | 6             | 0           | -0.972328               | 0.413165  | 0.254558  |
| 2             | 8             | 0           | 0.922552                | 1.060261  | -0.877121 |
| 3             | 6             | 0           | -1.806657               | 2.546472  | 1.055006  |
| 4             | 6             | 0           | -2.048235               | 2.057909  | -1.302222 |
| 5             | 6             | 0           | -3.097692               | 3.354573  | 0.987895  |
| 6             | 1             | 0           | -0.938928               | 3.208329  | 0.898548  |
| 7             | 1             | 0           | -1.704710               | 2.075733  | 2.035171  |
| 8             | 6             | 0           | -3.339742               | 2.872187  | -1.300857 |
| 9             | 1             | 0           | -1.200956               | 2.698922  | -1.587860 |
| 10            | 1             | 0           | -2.122390               | 1.243847  | -2.026573 |
| 11            | 1             | 0           | -3.055136               | 4.204463  | 1.676191  |
| 12            | 1             | 0           | -3.950296               | 2.713123  | 1.265276  |
| 13            | 1             | 0           | -3.475874               | 3.376194  | -2.263008 |
| 14            | 1             | 0           | -4.200557               | 2.206375  | -1.123451 |
| 15            | 7             | 0           | -1.847540               | 1.496771  | 0.031577  |
| 16            | 8             | 0           | -3.319296               | 3.904155  | -0.312166 |
| 17            | 6             | 0           | -2.721433               | -1.926471 | -0.323499 |
| 18            | 6             | 0           | -3.302462               | -2.937018 | -1.116557 |
| 19            | 6             | 0           | -3.265727               | -1.697058 | 0.954123  |
| 20            | 6             | 0           | -4.390458               | -3.683658 | -0.664982 |
| 21            | 1             | 0           | -2.894426               | -3.141530 | -2.102616 |
| 22            | 6             | 0           | -4.358476               | -2.438781 | 1.410755  |
| 23            | 1             | 0           | -2.816523               | -0.959214 | 1.607248  |
| 24            | 6             | 0           | -4.918034               | -3.424056 | 0.599738  |
| 25            | 1             | 0           | -4.825151               | -4.457136 | -1.289722 |
| 26            | 1             | 0           | -4.763257               | -2.253560 | 2.401188  |
| 27            | 6             | 0           | 2.101005                | 0.536428  | -0.609270 |
| 28            | 6             | 0           | 3.260133                | 1.266838  | -1.006330 |
| 29            | 6             | 0           | 2.302670                | -0.724645 | 0.027163  |
| 30            | 6             | 0           | 4.534700                | 0.770553  | -0.804662 |
| 31            | 1             | 0           | 3.110134                | 2.229728  | -1.484548 |
| 32            | 6             | 0           | 3.581313                | -1.216478 | 0.231447  |

|    |    |   |           |           |           |
|----|----|---|-----------|-----------|-----------|
| 33 | 1  | 0 | 1.443560  | -1.304114 | 0.333277  |
| 34 | 6  | 0 | 4.701782  | -0.478309 | -0.181339 |
| 35 | 1  | 0 | 5.409612  | 1.328598  | -1.116287 |
| 36 | 1  | 0 | 3.731158  | -2.180702 | 0.703391  |
| 37 | 7  | 0 | 6.025800  | -1.002653 | 0.031542  |
| 38 | 8  | 0 | 7.002279  | -0.340311 | -0.365233 |
| 39 | 8  | 0 | 6.150459  | -2.102551 | 0.598989  |
| 40 | 16 | 0 | -1.337715 | -1.056481 | -1.022225 |
| 41 | 8  | 0 | -0.722809 | 0.069437  | 1.417655  |
| 42 | 8  | 0 | 2.322319  | 1.413202  | 2.487370  |
| 43 | 1  | 0 | 2.401812  | 1.369561  | 1.525687  |
| 44 | 1  | 0 | 1.360135  | 1.288517  | 2.650250  |
| 45 | 1  | 0 | -5.758785 | -3.985706 | 0.949862  |

-----  
Total Energy (a.u.) = -2154.434721 ; **NIMAG = i147.75**

**Table S15.** Cartesian coordinates, energy (u.a.) and number of imaginary frequencies (NIMAG) for Transition State (TS2) associated to the departure of 4-Cl-BZS<sup>-</sup> anion from **9b** with one explicit water molecule, calculated using B3LYP/6-31G++(d,p) level theory

| Center Number | Atomic Number | Atomic Type | Coordinates (Angstroms) |           |           |
|---------------|---------------|-------------|-------------------------|-----------|-----------|
|               |               |             | X                       | Y         | Z         |
| 1             | 6             | 0           | 0.245991                | 0.687639  | 0.699294  |
| 2             | 8             | 0           | 1.384615                | 1.137009  | 0.045550  |
| 3             | 6             | 0           | -1.460877               | 2.240845  | 1.604861  |
| 4             | 6             | 0           | -0.678366               | 2.478991  | -0.684997 |
| 5             | 6             | 0           | -2.808753               | 2.754815  | 1.133269  |
| 6             | 1             | 0           | -0.878222               | 3.069060  | 2.014198  |
| 7             | 1             | 0           | -1.601281               | 1.514428  | 2.386598  |
| 8             | 6             | 0           | -2.061689               | 2.995018  | -1.045940 |
| 9             | 1             | 0           | -0.012312               | 3.324664  | -0.505389 |
| 10            | 1             | 0           | -0.285947               | 1.908492  | -1.513625 |
| 11            | 1             | 0           | -3.287697               | 3.315422  | 1.927791  |
| 12            | 1             | 0           | -3.448440               | 1.917784  | 0.859517  |
| 13            | 1             | 0           | -1.984729               | 3.732121  | -1.837400 |
| 14            | 1             | 0           | -2.683350               | 2.172850  | -1.392592 |
| 15            | 7             | 0           | -0.751264               | 1.627593  | 0.491329  |
| 16            | 8             | 0           | -2.679970               | 3.628671  | 0.041421  |
| 17            | 6             | 0           | -2.069747               | -1.080417 | -0.606217 |
| 18            | 6             | 0           | -2.924488               | -0.868513 | -1.689739 |
| 19            | 6             | 0           | -2.639062               | -1.444517 | 0.616150  |
| 20            | 6             | 0           | -4.298208               | -1.016011 | -1.560639 |

|    |    |   |           |           |           |
|----|----|---|-----------|-----------|-----------|
| 21 | 1  | 0 | -2.501984 | -0.590373 | -2.638715 |
| 22 | 6  | 0 | -4.013541 | -1.577906 | 0.747309  |
| 23 | 1  | 0 | -2.000725 | -1.615547 | 1.461939  |
| 24 | 6  | 0 | -4.852806 | -1.367874 | -0.338578 |
| 25 | 1  | 0 | -4.933514 | -0.851554 | -2.414863 |
| 26 | 1  | 0 | -4.427612 | -1.856538 | 1.701633  |
| 27 | 6  | 0 | 2.607132  | 0.584384  | 0.023865  |
| 28 | 6  | 0 | 3.632603  | 1.492946  | -0.248277 |
| 29 | 6  | 0 | 2.897021  | -0.767684 | 0.176928  |
| 30 | 6  | 0 | 4.935499  | 1.066287  | -0.365675 |
| 31 | 1  | 0 | 3.381806  | 2.530929  | -0.358801 |
| 32 | 6  | 0 | 4.205497  | -1.195965 | 0.059596  |
| 33 | 1  | 0 | 2.126732  | -1.473732 | 0.392695  |
| 34 | 6  | 0 | 5.213412  | -0.283978 | -0.209771 |
| 35 | 1  | 0 | 5.726036  | 1.759990  | -0.571117 |
| 36 | 1  | 0 | 4.438624  | -2.235370 | 0.177440  |
| 37 | 7  | 0 | 6.581428  | -0.743423 | -0.332467 |
| 38 | 8  | 0 | 7.431640  | 0.070533  | -0.568009 |
| 39 | 8  | 0 | 6.802259  | -1.912210 | -0.195231 |
| 40 | 16 | 0 | -0.316386 | -0.924624 | -0.815102 |
| 41 | 8  | 0 | 0.663719  | -3.516377 | 1.503427  |
| 42 | 1  | 0 | 0.308459  | -3.257325 | 0.664943  |
| 43 | 1  | 0 | 0.669976  | -2.708106 | 2.000272  |
| 44 | 8  | 0 | 0.420596  | 0.107435  | 1.994585  |
| 45 | 17 | 0 | -6.595023 | -1.550662 | -0.168676 |

-----  
Total Energy (a.u.) = -2153.102226 ; NIMAG = i143.07

**Table S16.** 1A Cartesian coordinates, energy (u.a.) and number of imaginary frequencies (NIMAG) for Transition State (TS2) associated to the departure of 4NPO<sup>-</sup> anion from **9b** with one explicit water molecule, calculated using B3LYP/6-31G++(d,p) level theory

| Center<br>Number | Atomic<br>Number | Atomic<br>Type | Coordinates (Angstroms) |          |           |
|------------------|------------------|----------------|-------------------------|----------|-----------|
|                  |                  |                | X                       | Y        | Z         |
| 1                | 6                | 0              | 0.245991                | 0.687639 | 0.699294  |
| 2                | 8                | 0              | 1.384615                | 1.137009 | 0.045550  |
| 3                | 6                | 0              | -1.460877               | 2.240845 | 1.604861  |
| 4                | 6                | 0              | -0.678366               | 2.478991 | -0.684997 |
| 5                | 6                | 0              | -2.808753               | 2.754815 | 1.133269  |
| 6                | 1                | 0              | -0.878222               | 3.069060 | 2.014198  |
| 7                | 1                | 0              | -1.601281               | 1.514428 | 2.386598  |
| 8                | 6                | 0              | -2.061689               | 2.995018 | -1.045940 |
| 9                | 1                | 0              | -0.012312               | 3.324664 | -0.505389 |

|    |    |   |           |           |           |
|----|----|---|-----------|-----------|-----------|
| 10 | 1  | 0 | -0.285947 | 1.908492  | -1.513625 |
| 11 | 1  | 0 | -3.287697 | 3.315422  | 1.927791  |
| 12 | 1  | 0 | -3.448440 | 1.917784  | 0.859517  |
| 13 | 1  | 0 | -1.984729 | 3.732121  | -1.837400 |
| 14 | 1  | 0 | -2.683350 | 2.172850  | -1.392592 |
| 15 | 7  | 0 | -0.751264 | 1.627593  | 0.491329  |
| 16 | 8  | 0 | -2.679970 | 3.628671  | 0.041421  |
| 17 | 6  | 0 | -2.069747 | -1.080417 | -0.606217 |
| 18 | 6  | 0 | -2.924488 | -0.868513 | -1.689739 |
| 19 | 6  | 0 | -2.639062 | -1.444517 | 0.616150  |
| 20 | 6  | 0 | -4.298208 | -1.016011 | -1.560639 |
| 21 | 1  | 0 | -2.501984 | -0.590373 | -2.638715 |
| 22 | 6  | 0 | -4.013541 | -1.577906 | 0.747309  |
| 23 | 1  | 0 | -2.000725 | -1.615547 | 1.461939  |
| 24 | 6  | 0 | -4.852806 | -1.367874 | -0.338578 |
| 25 | 1  | 0 | -4.933514 | -0.851554 | -2.414863 |
| 26 | 1  | 0 | -4.427612 | -1.856538 | 1.701633  |
| 27 | 6  | 0 | 2.607132  | 0.584384  | 0.023865  |
| 28 | 6  | 0 | 3.632603  | 1.492946  | -0.248277 |
| 29 | 6  | 0 | 2.897021  | -0.767684 | 0.176928  |
| 30 | 6  | 0 | 4.935499  | 1.066287  | -0.365675 |
| 31 | 1  | 0 | 3.381806  | 2.530929  | -0.358801 |
| 32 | 6  | 0 | 4.205497  | -1.195965 | 0.059596  |
| 33 | 1  | 0 | 2.126732  | -1.473732 | 0.392695  |
| 34 | 6  | 0 | 5.213412  | -0.283978 | -0.209771 |
| 35 | 1  | 0 | 5.726036  | 1.759990  | -0.571117 |
| 36 | 1  | 0 | 4.438624  | -2.235370 | 0.177440  |
| 37 | 7  | 0 | 6.581428  | -0.743423 | -0.332467 |
| 38 | 8  | 0 | 7.431640  | 0.070533  | -0.568009 |
| 39 | 8  | 0 | 6.802259  | -1.912210 | -0.195231 |
| 40 | 16 | 0 | -0.316386 | -0.924624 | -0.815102 |
| 41 | 8  | 0 | 0.663719  | -3.516377 | 1.503427  |
| 42 | 1  | 0 | 0.308459  | -3.257325 | 0.664943  |
| 43 | 1  | 0 | 0.669976  | -2.708106 | 2.000272  |
| 44 | 8  | 0 | 0.420596  | 0.107435  | 1.994585  |
| 45 | 17 | 0 | -6.595023 | -1.550662 | -0.168676 |

-----  
Total Energy (a.u.) = -2153.124425 ; NIMAG = i146.12

**Table S17.** Cartesian coordinates, energy (u.a.) and number of imaginary frequencies (NIMAG) for Transition State (TS2) associated to the departure of BZS<sup>-</sup> anion from **8a** without explicit water molecules, calculated using B3LYP/6-31G++(d,p) level theory  
-----



| Center<br>Number | Atomic<br>Number | Atomic<br>Type | Coordinates (Angstroms) |          |          |
|------------------|------------------|----------------|-------------------------|----------|----------|
|                  |                  |                | X                       | Y        | Z        |
| 1                | 6                | 0              | 0.24115                 | -1.32283 | 0.81679  |
| 2                | 16               | 0              | 0.96622                 | -2.0069  | 2.21864  |
| 3                | 8                | 0              | 1.01318                 | -0.64838 | -0.07361 |
| 4                | 6                | 0              | 2.10957                 | 0.06987  | 0.28517  |
| 5                | 6                | 0              | 3.22467                 | -0.08705 | -0.50832 |
| 6                | 6                | 0              | 2.10716                 | 0.9867   | 1.32677  |
| 7                | 6                | 0              | 4.33793                 | 0.69155  | -0.24563 |
| 8                | 1                | 0              | 3.22569                 | -0.7984  | -1.3077  |
| 9                | 6                | 0              | 3.23919                 | 1.74309  | 1.56608  |
| 10               | 1                | 0              | 1.22841                 | 1.08142  | 1.93066  |
| 11               | 6                | 0              | 4.37246                 | 1.60809  | 0.78344  |
| 12               | 1                | 0              | 3.23684                 | 2.44893  | 2.37636  |
| 13               | 6                | 0              | -2.01304                | 1.10615  | 0.70628  |
| 14               | 6                | 0              | -3.14478                | 1.54271  | 1.43756  |
| 15               | 6                | 0              | -1.97857                | 1.43374  | -0.66946 |
| 16               | 6                | 0              | -4.15306                | 2.25719  | 0.84488  |
| 17               | 1                | 0              | -3.18144                | 1.30162  | 2.48438  |
| 18               | 6                | 0              | -2.99761                | 2.14619  | -1.2535  |
| 19               | 1                | 0              | -1.13708                | 1.12356  | -1.25583 |
| 20               | 6                | 0              | -4.10166                | 2.57189  | -0.51509 |
| 21               | 1                | 0              | -4.99715                | 2.57933  | 1.4298   |
| 22               | 1                | 0              | -2.94296                | 2.38687  | -2.30117 |
| 23               | 6                | 0              | -1.58699                | -3.06107 | -1.91099 |
| 24               | 6                | 0              | -0.34673                | -2.70362 | -1.1089  |
| 25               | 6                | 0              | -1.70689                | -2.75322 | 0.87714  |
| 26               | 6                | 0              | -2.90195                | -3.08535 | 0.00263  |
| 27               | 1                | 0              | 0.29631                 | -2.08317 | -1.71317 |
| 28               | 1                | 0              | 0.19738                 | -3.61352 | -0.84644 |
| 29               | 1                | 0              | -1.3156                 | -3.68475 | -2.75506 |
| 30               | 1                | 0              | -2.04879                | -2.1481  | -2.28646 |
| 31               | 1                | 0              | -1.25536                | -3.67002 | 1.2506   |
| 32               | 1                | 0              | -2.0159                 | -2.16212 | 1.72641  |
| 33               | 1                | 0              | -3.42487                | -2.17222 | -0.27716 |
| 34               | 1                | 0              | -3.58931                | -3.72932 | 0.53783  |
| 35               | 7                | 0              | -0.75364                | -1.98488 | 0.09215  |
| 36               | 8                | 0              | -2.51067                | -3.78403 | -1.15081 |
| 37               | 7                | 0              | 5.58209                 | 2.40743  | 1.02581  |
| 38               | 8                | 0              | 5.62282                 | 3.16488  | 1.95157  |
| 39               | 8                | 0              | 6.54357                 | 2.26393  | 0.32767  |
| 40               | 1                | 0              | 5.20377                 | 0.57805  | -0.86396 |
| 41               | 1                | 0              | -4.89039                | 3.12627  | -0.97927 |
| 42               | 16               | 0              | -0.75842                | 0.24896  | 1.53336  |

-----  
Total Energy (a.u.) = -1864.892386 ; **NIMAG = i159.59**

**Table S18.** Cartesian coordinates, energy (u.a.) and number of imaginary frequencies (NIMAG) for Transition State (TS2) associated to the departure of 4NPO<sup>-</sup> anion from **8a** without explicit water molecules, calculated using B3LYP/6-31G++(d,p) level theory

| Center Number | Atomic Number | Atomic Type | Coordinates (Angstroms) |          |          |
|---------------|---------------|-------------|-------------------------|----------|----------|
|               |               |             | X                       | Y        | Z        |
| 1             | 6             | 0           | -0.23289                | 1.28716  | -0.29143 |
| 2             | 16            | 0           | 0.01655                 | 0.59866  | -1.84026 |
| 3             | 8             | 0           | 0.46334                 | 0.02586  | 0.82468  |
| 4             | 6             | 0           | 1.31465                 | -0.94123 | 0.81829  |
| 5             | 6             | 0           | 2.33393                 | -1.09772 | 1.78032  |
| 6             | 6             | 0           | 1.23038                 | -1.94336 | -0.17054 |
| 7             | 6             | 0           | 3.16526                 | -2.1947  | 1.72158  |
| 8             | 1             | 0           | 2.46653                 | -0.36767 | 2.5485   |
| 9             | 6             | 0           | 2.08122                 | -3.03024 | -0.19217 |
| 10            | 1             | 0           | 0.45529                 | -1.84183 | -0.90944 |
| 11            | 6             | 0           | 3.07899                 | -3.18003 | 0.75506  |
| 12            | 1             | 0           | 1.96802                 | -3.77528 | -0.96132 |
| 13            | 6             | 0           | -3.0572                 | 0.13884  | 0.2863   |
| 14            | 6             | 0           | -4.35994                | 0.60517  | 0.19385  |
| 15            | 6             | 0           | -2.79876                | -1.2239  | 0.26579  |
| 16            | 6             | 0           | -5.41009                | -0.28094 | 0.08201  |
| 17            | 1             | 0           | -4.53336                | 1.66448  | 0.21114  |
| 18            | 6             | 0           | -3.851                  | -2.1062  | 0.15008  |
| 19            | 1             | 0           | -1.79583                | -1.58318 | 0.33048  |
| 20            | 6             | 0           | -5.16078                | -1.64611 | 0.05861  |
| 21            | 1             | 0           | -6.41861                | 0.08271  | 0.00898  |
| 22            | 1             | 0           | -3.65474                | -3.16233 | 0.13115  |
| 23            | 6             | 0           | 2.29172                 | 3.86893  | 0.51579  |
| 24            | 6             | 0           | 1.74416                 | 2.68945  | -0.2665  |
| 25            | 6             | 0           | -0.43039                | 3.69782  | -0.14574 |
| 26            | 6             | 0           | 0.19186                 | 4.85463  | 0.61737  |
| 27            | 1             | 0           | 1.85146                 | 2.8705   | -1.33471 |
| 28            | 1             | 0           | 2.2985                  | 1.80105  | -0.00971 |
| 29            | 1             | 0           | 2.29607                 | 3.63219  | 1.57937  |
| 30            | 1             | 0           | 3.30537                 | 4.08888  | 0.2037   |
| 31            | 1             | 0           | -0.45645                | 3.93169  | -1.21246 |
| 32            | 1             | 0           | -1.44253                | 3.55585  | 0.1998   |
| 33            | 1             | 0           | -0.31694                | 5.78007  | 0.37189  |
| 34            | 1             | 0           | 0.08949                 | 4.67386  | 1.68783  |
| 35            | 7             | 0           | 0.35454                 | 2.49543  | 0.10221  |
| 36            | 8             | 0           | 1.53896                 | 5.03259  | 0.29086  |

|    |    |   |          |          |          |
|----|----|---|----------|----------|----------|
| 37 | 7  | 0 | 4.02065  | -4.30871 | 0.73859  |
| 38 | 8  | 0 | 3.94287  | -5.14046 | -0.11842 |
| 39 | 8  | 0 | 4.86507  | -4.39588 | 1.58221  |
| 40 | 1  | 0 | 3.92428  | -2.29019 | 2.46969  |
| 41 | 16 | 0 | -1.96272 | 1.24007  | 0.51935  |
| 42 | 1  | 0 | -5.97049 | -2.34005 | -0.02919 |

-----  
Total Energy (a.u.) = -1864.888943 ; **NIMAG = i158.25**

**Table S19.** Cartesian coordinates, energy (u.a.) and number of imaginary frequencies (NIMAG) for Transition State (TS2) associated to the departure of 4-CIBZS<sup>-</sup> anion from **8b**, without explicit water molecules, calculated using B3LYP/6-31G++(d,p) level theory

| Center Number | Atomic Number | Atomic Type | Coordinates (Angstroms) |          |          |
|---------------|---------------|-------------|-------------------------|----------|----------|
|               |               |             | X                       | Y        | Z        |
| 1             | 6             | 0           | 0.25562                 | -1.27319 | 0.52408  |
| 2             | 16            | 0           | 0.9807                  | -1.95726 | 1.92593  |
| 3             | 8             | 0           | 1.02766                 | -0.59873 | -0.36632 |
| 4             | 6             | 0           | 2.12404                 | 0.11951  | -0.00754 |
| 5             | 6             | 0           | 2.15942                 | 1.42834  | -0.43582 |
| 6             | 6             | 0           | 3.11947                 | -0.37999 | 0.8202   |
| 7             | 6             | 0           | 3.2058                  | 2.2322   | -0.01935 |
| 8             | 1             | 0           | 1.3933                  | 1.80962  | -1.07823 |
| 9             | 6             | 0           | 4.15449                 | 0.44868  | 1.21122  |
| 10            | 1             | 0           | 3.06888                 | -1.40307 | 1.13104  |
| 11            | 6             | 0           | 4.21398                 | 1.76813  | 0.79823  |
| 12            | 1             | 0           | 4.92694                 | 0.05837  | 1.8482   |
| 13            | 6             | 0           | -0.39822                | 1.86062  | 1.89082  |
| 14            | 6             | 0           | -0.38043                | 3.13071  | 1.26411  |
| 15            | 6             | 0           | -0.29476                | 1.84506  | 3.30157  |
| 16            | 6             | 0           | -0.27887                | 4.2896   | 1.98869  |
| 17            | 1             | 0           | -0.46047                | 3.15559  | 0.19254  |
| 18            | 6             | 0           | -0.18848                | 3.01313  | 4.01675  |
| 19            | 1             | 0           | -0.3077                 | 0.90329  | 3.81249  |
| 20            | 6             | 0           | -0.17802                | 4.25478  | 3.38146  |
| 21            | 1             | 0           | -0.27391                | 5.23946  | 1.48257  |
| 22            | 1             | 0           | -0.11706                | 2.97251  | 5.08995  |
| 23            | 6             | 0           | -1.57251                | -3.01142 | -2.2037  |
| 24            | 6             | 0           | -0.33226                | -2.65398 | -1.40161 |
| 25            | 6             | 0           | -1.69241                | -2.70358 | 0.58444  |
| 26            | 6             | 0           | -2.88748                | -3.03571 | -0.29007 |
| 27            | 1             | 0           | 0.31078                 | -2.03353 | -2.00587 |
| 28            | 1             | 0           | 0.21186                 | -3.56388 | -1.13914 |
| 29            | 1             | 0           | -1.30112                | -3.63511 | -3.04777 |

|    |    |   |          |          |          |
|----|----|---|----------|----------|----------|
| 30 | 1  | 0 | -2.03432 | -2.09846 | -2.57917 |
| 31 | 1  | 0 | -1.24088 | -3.62038 | 0.95789  |
| 32 | 1  | 0 | -2.00142 | -2.11248 | 1.43371  |
| 33 | 1  | 0 | -3.4104  | -2.12258 | -0.56987 |
| 34 | 1  | 0 | -3.57483 | -3.67968 | 0.24513  |
| 35 | 7  | 0 | -0.73917 | -1.93523 | -0.20056 |
| 36 | 8  | 0 | -2.4962  | -3.73439 | -1.44352 |
| 37 | 7  | 0 | 5.30782  | 2.66053  | 1.20818  |
| 38 | 8  | 0 | 6.20596  | 2.23765  | 1.87671  |
| 39 | 8  | 0 | 5.32585  | 3.79648  | 0.83173  |
| 40 | 1  | 0 | 3.23342  | 3.25145  | -0.3438  |
| 41 | 16 | 0 | -0.57568 | 0.44435  | 0.91327  |
| 42 | 17 | 0 | -0.04104 | 5.74211  | 4.31242  |

-----  
Total Energy (a.u.) = -1863.723169 ; NIMAG = **i160.33**

**Table S20.** Cartesian coordinates, energy (u.a.) and number of imaginary frequencies (NIMAG) for Transition State (TS2) associated to the departure of 4NPO<sup>-</sup> anion from **8b** without explicit water molecules, calculated using B3LYP/6-31G++(d,p) level theory

| Center<br>Number | Atomic<br>Number | Atomic<br>Type | Coordinates (Angstroms) |          |          |
|------------------|------------------|----------------|-------------------------|----------|----------|
|                  |                  |                | X                       | Y        | Z        |
| 1                | 6                | 0              | -0.23289                | 1.28716  | -0.29143 |
| 2                | 16               | 0              | 0.01655                 | 0.59866  | -1.84026 |
| 3                | 8                | 0              | 0.46095                 | 0.03019  | 0.82086  |
| 4                | 6                | 0              | 1.37619                 | -0.87639 | 0.84297  |
| 5                | 6                | 0              | 2.32775                 | -1.00785 | 1.87553  |
| 6                | 6                | 0              | 1.43816                 | -1.83587 | -0.18887 |
| 7                | 6                | 0              | 3.23624                 | -2.04284 | 1.83871  |
| 8                | 1                | 0              | 2.3498                  | -0.30628 | 2.6805   |
| 9                | 6                | 0              | 2.36252                 | -2.86118 | -0.18679 |
| 10               | 1                | 0              | 0.71635                 | -1.75299 | -0.98209 |
| 11               | 6                | 0              | 3.29334                 | -2.98673 | 0.8296   |
| 12               | 1                | 0              | 2.3609                  | -3.57635 | -0.99178 |
| 13               | 6                | 0              | -3.0572                 | 0.13884  | 0.2863   |
| 14               | 6                | 0              | -4.36574                | 0.59721  | 0.25869  |
| 15               | 6                | 0              | -2.79002                | -1.22003 | 0.20645  |
| 16               | 6                | 0              | -5.41299                | -0.29308 | 0.15294  |
| 17               | 1                | 0              | -4.54592                | 1.65369  | 0.32111  |
| 18               | 6                | 0              | -3.83952                | -2.10638 | 0.09706  |
| 19               | 1                | 0              | -1.78286                | -1.57294 | 0.22122  |
| 20               | 6                | 0              | -5.15502                | -1.65434 | 0.07046  |
| 21               | 1                | 0              | -6.42606                | 0.06446  | 0.13021  |
| 22               | 1                | 0              | -3.6366                 | -3.15944 | 0.0323   |

|    |    |   |          |          |          |
|----|----|---|----------|----------|----------|
| 23 | 6  | 0 | 2.27207  | 3.9373   | 0.33526  |
| 24 | 6  | 0 | 1.66614  | 2.78571  | -0.44556 |
| 25 | 6  | 0 | -0.50784 | 3.66917  | 0.05778  |
| 26 | 6  | 0 | 0.17006  | 4.80333  | 0.80736  |
| 27 | 1  | 0 | 1.60879  | 3.04296  | -1.50193 |
| 28 | 1  | 0 | 2.28874  | 1.91224  | -0.33645 |
| 29 | 1  | 0 | 2.44144  | 3.63069  | 1.36703  |
| 30 | 1  | 0 | 3.21924  | 4.23007  | -0.10113 |
| 31 | 1  | 0 | -0.699   | 3.972    | -0.97421 |
| 32 | 1  | 0 | -1.4519  | 3.45195  | 0.5327   |
| 33 | 1  | 0 | -0.40743 | 5.71533  | 0.70564  |
| 34 | 1  | 0 | 0.23261  | 4.54648  | 1.86526  |
| 35 | 7  | 0 | 0.35454  | 2.49543  | 0.10221  |
| 36 | 8  | 0 | 1.44647  | 5.07258  | 0.30611  |
| 37 | 7  | 0 | 4.31057  | -4.04785 | 0.84234  |
| 38 | 8  | 0 | 4.35697  | -4.84307 | -0.05086 |
| 39 | 8  | 0 | 5.09234  | -4.11655 | 1.74591  |
| 40 | 1  | 0 | 3.94093  | -2.12121 | 2.64007  |
| 41 | 16 | 0 | -1.96272 | 1.24007  | 0.51935  |
| 42 | 17 | 0 | -6.48317 | -2.80098 | -0.06687 |

-----  
Total Energy (a.u.) = -1863.719073 ; **NIMAG = i159.81**

**Table S21.** Cartesian coordinates, energy (u.a.) and number of imaginary frequencies (NIMAG) for Transition State (TS2) associated to the departure of BZS<sup>-</sup> anion from **9a** without explicit water molecules, calculated using B3LYP/6-31G++(d,p) level theory

| Center<br>Number | Atomic<br>Number | Atomic<br>Type | Coordinates (Angstroms) |          |          |
|------------------|------------------|----------------|-------------------------|----------|----------|
|                  |                  |                | X                       | Y        | Z        |
| 1                | 6                | 0              | -0.1121                 | 1.14965  | 0.74829  |
| 2                | 8                | 0              | -0.88414                | 0.47519  | -0.14211 |
| 3                | 6                | 0              | -1.98052                | -0.24305 | 0.21667  |
| 4                | 6                | 0              | -3.09563                | -0.08613 | -0.57682 |
| 5                | 6                | 0              | -1.97811                | -1.15989 | 1.25827  |
| 6                | 6                | 0              | -4.20888                | -0.86473 | -0.31413 |
| 7                | 1                | 0              | -3.09665                | 0.62521  | -1.37619 |
| 8                | 6                | 0              | -3.11014                | -1.91628 | 1.49758  |
| 9                | 1                | 0              | -1.09936                | -1.2546  | 1.86217  |
| 10               | 6                | 0              | -4.24341                | -1.78127 | 0.71495  |
| 11               | 1                | 0              | -3.10779                | -2.62211 | 2.30786  |
| 12               | 6                | 0              | 1.92091                 | -1.04459 | 0.91178  |
| 13               | 6                | 0              | 3.05266                 | -1.48115 | 1.64306  |
| 14               | 6                | 0              | 1.88644                 | -1.37218 | -0.46396 |

|    |    |   |          |          |          |
|----|----|---|----------|----------|----------|
| 15 | 6  | 0 | 4.06093  | -2.19564 | 1.05038  |
| 16 | 1  | 0 | 3.08932  | -1.24006 | 2.68988  |
| 17 | 6  | 0 | 2.90549  | -2.08463 | -1.04801 |
| 18 | 1  | 0 | 1.04496  | -1.062   | -1.05034 |
| 19 | 6  | 0 | 4.00953  | -2.51033 | -0.3096  |
| 20 | 1  | 0 | 4.90503  | -2.51777 | 1.6353   |
| 21 | 1  | 0 | 2.85084  | -2.32531 | -2.09567 |
| 22 | 6  | 0 | 1.71604  | 2.88788  | -1.97949 |
| 23 | 6  | 0 | 0.47578  | 2.53044  | -1.1774  |
| 24 | 6  | 0 | 1.83593  | 2.58004  | 0.80865  |
| 25 | 6  | 0 | 3.031    | 2.91217  | -0.06587 |
| 26 | 1  | 0 | -0.16726 | 1.90998  | -1.78167 |
| 27 | 1  | 0 | -0.06833 | 3.44034  | -0.91493 |
| 28 | 1  | 0 | 1.44465  | 3.51156  | -2.82356 |
| 29 | 1  | 0 | 2.17784  | 1.97491  | -2.35496 |
| 30 | 1  | 0 | 1.38441  | 3.49683  | 1.1821   |
| 31 | 1  | 0 | 2.14495  | 1.98893  | 1.65791  |
| 32 | 1  | 0 | 3.55392  | 1.99904  | -0.34566 |
| 33 | 1  | 0 | 3.71836  | 3.55614  | 0.46934  |
| 34 | 7  | 0 | 0.88269  | 1.81169  | 0.02365  |
| 35 | 8  | 0 | 2.63972  | 3.61084  | -1.21931 |
| 36 | 8  | 0 | -0.71677 | 1.72012  | 1.91736  |
| 37 | 7  | 0 | -5.45304 | -2.58061 | 0.95731  |
| 38 | 8  | 0 | -6.40477 | -2.45698 | 0.24223  |
| 39 | 8  | 0 | -5.46805 | -3.39058 | 1.83832  |
| 40 | 1  | 0 | -5.07472 | -0.75123 | -0.93245 |
| 41 | 1  | 0 | 4.79827  | -3.06471 | -0.77377 |
| 42 | 16 | 0 | 0.78494  | -0.26846 | 1.66064  |

-----  
Total Energy (a.u.) = -1866.713347508 ; NIMAG = **i161.89**

**Table S22.** Cartesian coordinates, energy (u.a.) and number of imaginary frequencies (NIMAG) for Transition State (TS2) associated to the departure of 4NPO<sup>-</sup> anion from **9a** without explicit water molecules, calculated using B3LYP/6-31G++(d,p) level theory

| Center Number | Atomic Number | Atomic Type | Coordinates (Angstroms) |          |          |
|---------------|---------------|-------------|-------------------------|----------|----------|
|               |               |             | X                       | Y        | Z        |
| 1             | 6             | 0           | -0.23289                | 1.28716  | -0.29143 |
| 2             | 8             | 0           | 0.6464                  | 0.243    | 1.02598  |
| 3             | 6             | 0           | 1.28162                 | -0.87696 | 0.97871  |
| 4             | 6             | 0           | 2.31849                 | -1.15468 | 0.06401  |
| 5             | 6             | 0           | 0.97719                 | -1.89567 | 1.90536  |
| 6             | 6             | 0           | 2.97613                 | -2.36373 | 0.1243   |

|    |    |   |          |          |          |
|----|----|---|----------|----------|----------|
| 7  | 1  | 0 | 2.59073  | -0.43502 | -0.67669 |
| 8  | 6  | 0 | 1.6633   | -3.0932  | 1.9354   |
| 9  | 1  | 0 | 0.19188  | -1.69835 | 2.61347  |
| 10 | 6  | 0 | 2.68108  | -3.36037 | 1.03652  |
| 11 | 1  | 0 | 1.40111  | -3.83464 | 2.67092  |
| 12 | 6  | 0 | -2.99627 | 0.16779  | 0.27675  |
| 13 | 6  | 0 | -4.29901 | 0.63413  | 0.1843   |
| 14 | 6  | 0 | -2.73783 | -1.19495 | 0.25624  |
| 15 | 6  | 0 | -5.34917 | -0.25198 | 0.07246  |
| 16 | 1  | 0 | -4.47243 | 1.69344  | 0.2016   |
| 17 | 6  | 0 | -3.79007 | -2.07724 | 0.14053  |
| 18 | 1  | 0 | -1.7349  | -1.55422 | 0.32093  |
| 19 | 6  | 0 | -5.09986 | -1.61715 | 0.04906  |
| 20 | 1  | 0 | -6.35768 | 0.11167  | -5.7273  |
| 21 | 1  | 0 | -3.59381 | -3.13338 | 0.1216   |
| 22 | 6  | 0 | 2.29172  | 3.86893  | 0.51579  |
| 23 | 6  | 0 | 1.74416  | 2.68945  | -0.2665  |
| 24 | 6  | 0 | -0.43039 | 3.69782  | -0.14574 |
| 25 | 6  | 0 | 0.19186  | 4.85463  | 0.61737  |
| 26 | 1  | 0 | 1.85146  | 2.8705   | -1.33471 |
| 27 | 1  | 0 | 2.2985   | 1.80105  | -0.00971 |
| 28 | 1  | 0 | 2.29607  | 3.63219  | 1.57937  |
| 29 | 1  | 0 | 3.30537  | 4.08888  | 0.2037   |
| 30 | 1  | 0 | -0.45645 | 3.93169  | -1.21246 |
| 31 | 1  | 0 | -1.44253 | 3.55585  | 0.1998   |
| 32 | 1  | 0 | -0.31694 | 5.78007  | 0.37189  |
| 33 | 1  | 0 | 0.08949  | 4.67386  | 1.68783  |
| 34 | 7  | 0 | 0.35454  | 2.49543  | 0.10221  |
| 35 | 8  | 0 | 1.53896  | 5.03259  | 0.29086  |
| 36 | 7  | 0 | 3.42307  | -4.62937 | 1.03785  |
| 37 | 8  | 0 | 3.13612  | -5.48951 | 1.81897  |
| 38 | 8  | 0 | 4.3141   | -4.80238 | 0.25782  |
| 39 | 1  | 0 | 3.76352  | -2.54265 | -0.57777 |
| 40 | 8  | 0 | -0.02584 | 0.71565  | -1.57707 |
| 41 | 16 | 0 | -1.92968 | 1.24097  | 0.50387  |
| 42 | 1  | 0 | -5.90957 | -2.31109 | -0.03874 |

-----  
Total Energy (a.u.) = -1866.710463 ; **NIMAG = i160.93**

**Table S23.** Cartesian coordinates, energy (u.a.) and number of imaginary frequencies (NIMAG) for Transition State (TS2) associated to the departure of 4-CIBZS<sup>-</sup> anion from **9b** without explicit water molecules, calculated using B3LYP/6-31G++(d,p) level theory

| Center<br>Number | Atomic<br>Number | Atomic<br>Type | Coordinates (Angstroms) |   |   |
|------------------|------------------|----------------|-------------------------|---|---|
|                  |                  |                | X                       | Y | Z |

---

|    |    |   |          |          |          |
|----|----|---|----------|----------|----------|
| 1  | 6  | 0 | -0.1121  | 1.14965  | 0.74829  |
| 2  | 8  | 0 | -0.88414 | 0.47519  | -0.14211 |
| 3  | 6  | 0 | -1.98052 | -0.24305 | 0.21667  |
| 4  | 6  | 0 | -3.18731 | 0.20532  | -0.27356 |
| 5  | 6  | 0 | -1.90955 | -1.41692 | 0.95324  |
| 6  | 6  | 0 | -4.3234  | -0.54217 | -0.01836 |
| 7  | 1  | 0 | -3.24007 | 1.11353  | -0.83692 |
| 8  | 6  | 0 | -3.06537 | -2.13528 | 1.19598  |
| 9  | 1  | 0 | -0.95878 | -1.73647 | 1.32712  |
| 10 | 6  | 0 | -4.29067 | -1.70978 | 0.71364  |
| 11 | 1  | 0 | -3.00884 | -3.04141 | 1.77086  |
| 12 | 6  | 0 | 0.70871  | -0.85722 | 3.10979  |
| 13 | 6  | 0 | 0.86377  | -2.26314 | 3.18441  |
| 14 | 6  | 0 | 0.21147  | -0.20915 | 4.26475  |
| 15 | 6  | 0 | 0.5576   | -2.9617  | 4.32312  |
| 16 | 1  | 0 | 1.24281  | -2.76669 | 2.31375  |
| 17 | 6  | 0 | -0.0966  | -0.92071 | 5.39874  |
| 18 | 1  | 0 | 0.08322  | 0.85453  | 4.24828  |
| 19 | 6  | 0 | 0.06801  | -2.30461 | 5.45438  |
| 20 | 1  | 0 | 0.69212  | -4.02922 | 4.34948  |
| 21 | 1  | 0 | -0.46777 | -0.40145 | 6.26541  |
| 22 | 6  | 0 | 1.78489  | 2.73329  | -2.02621 |
| 23 | 6  | 0 | 0.51686  | 2.36059  | -1.27618 |
| 24 | 6  | 0 | 1.71064  | 2.73743  | 0.78045  |
| 25 | 6  | 0 | 2.94132  | 3.07347  | -0.04161 |
| 26 | 1  | 0 | -0.02807 | 1.6269   | -1.84921 |
| 27 | 1  | 0 | -0.11378 | 3.24424  | -1.15648 |
| 28 | 1  | 0 | 1.53325  | 3.23773  | -2.95211 |
| 29 | 1  | 0 | 2.34274  | 1.82754  | -2.26324 |
| 30 | 1  | 0 | 1.16288  | 3.64763  | 1.01576  |
| 31 | 1  | 0 | 1.9968   | 2.269    | 1.71041  |
| 32 | 1  | 0 | 3.55249  | 2.18298  | -0.17958 |
| 33 | 1  | 0 | 3.53388  | 3.82679  | 0.46335  |
| 34 | 7  | 0 | 0.88269  | 1.81169  | 0.02365  |
| 35 | 8  | 0 | 2.58885  | 3.60891  | -1.29091 |
| 36 | 8  | 0 | -0.71972 | 1.7229   | 1.92306  |
| 37 | 7  | 0 | -5.52693 | -2.46508 | 0.96281  |
| 38 | 8  | 0 | -6.56449 | -2.08145 | 0.50593  |
| 39 | 8  | 0 | -5.4876  | -3.48983 | 1.57988  |
| 40 | 1  | 0 | -5.26179 | -0.20137 | -0.40332 |
| 41 | 16 | 0 | 1.11735  | -0.11619 | 1.79166  |
| 42 | 17 | 0 | -0.33159 | -3.20154 | 6.915    |

---

Total Energy (a.u.) = -1866.497530892 ; **NIMAG = i162.17**



**Table S24.** Cartesian coordinates, energy (u.a.) and number of imaginary frequencies (NIMAG) for Transition State (TS2) associated to the departure of 4-NPO<sup>-</sup> anion from **9b** without explicit water molecules, calculated using B3LYP/6-31G++(d,p) level theory

| Center Number | Atomic Number | Atomic Type | Coordinates (Angstroms) |          |          |
|---------------|---------------|-------------|-------------------------|----------|----------|
|               |               |             | X                       | Y        | Z        |
| 1             | 6             | 0           | -0.23289                | 1.28716  | -0.29143 |
| 2             | 8             | 0           | 0.627                   | 0.22569  | 1.00018  |
| 3             | 6             | 0           | 1.28157                 | -0.8829  | 0.94917  |
| 4             | 6             | 0           | 2.34809                 | -1.12591 | 0.059    |
| 5             | 6             | 0           | 0.96802                 | -1.92455 | 1.84683  |
| 6             | 6             | 0           | 3.02351                 | -2.32535 | 0.11439  |
| 7             | 1             | 0           | 2.62915                 | -0.38743 | -0.65954 |
| 8             | 6             | 0           | 1.67256                 | -3.11142 | 1.87301  |
| 9             | 1             | 0           | 0.16004                 | -1.75383 | 2.53609  |
| 10            | 6             | 0           | 2.71938                 | -3.3445  | 0.99833  |
| 11            | 1             | 0           | 1.40204                 | -3.87142 | 2.58625  |
| 12            | 6             | 0           | -2.99627                | 0.16779  | 0.27675  |
| 13            | 6             | 0           | -4.304                  | 0.62769  | 0.23815  |
| 14            | 6             | 0           | -2.73042                | -1.19188 | 0.20698  |
| 15            | 6             | 0           | -5.35176                | -0.26188 | 0.13138  |
| 16            | 1             | 0           | -4.48315                | 1.68477  | 0.29289  |
| 17            | 6             | 0           | -3.78041                | -2.07754 | 0.09654  |
| 18            | 1             | 0           | -1.72385                | -1.54601 | 0.23022  |
| 19            | 6             | 0           | -5.09511                | -1.62396 | 0.05894  |
| 20            | 1             | 0           | -6.3642                 | 0.09683  | 0.10012  |
| 21            | 1             | 0           | -3.5785                 | -3.13124 | 0.03956  |
| 22            | 6             | 0           | 2.2792                  | 3.92052  | 0.37614  |
| 23            | 6             | 0           | 1.68681                 | 2.76276  | -0.40595 |
| 24            | 6             | 0           | -0.49275                | 3.67736  | 0.01011  |
| 25            | 6             | 0           | 0.17242                 | 4.81642  | 0.76366  |
| 26            | 1             | 0           | 1.66752                 | 3.00323  | -1.46764 |
| 27            | 1             | 0           | 2.29565                 | 1.88464  | -0.26206 |
| 28            | 1             | 0           | 2.4107                  | 3.6291   | 1.41779  |
| 29            | 1             | 0           | 3.24358                 | 4.19603  | -0.03295 |
| 30            | 1             | 0           | -0.64606                | 3.96523  | -1.03243 |
| 31            | 1             | 0           | -1.45445                | 3.47799  | 0.45659  |
| 32            | 1             | 0           | -0.39116                | 5.7327   | 0.62806  |
| 33            | 1             | 0           | 0.19685                 | 4.57631  | 1.82705  |
| 34            | 7             | 0           | 0.35454                 | 2.49543  | 0.10221  |
| 35            | 8             | 0           | 1.46773                 | 5.06386  | 0.30116  |
| 36            | 7             | 0           | 3.48174                 | -4.60136 | 0.99601  |
| 37            | 8             | 0           | 3.18715                 | -5.48131 | 1.75181  |
| 38            | 8             | 0           | 4.39701                 | -4.74467 | 0.23834  |
| 39            | 1             | 0           | 3.8331                  | -2.47776 | -0.56842 |

|    |    |   |          |         |          |
|----|----|---|----------|---------|----------|
| 40 | 8  | 0 | -0.02584 | 0.71565 | -1.57707 |
| 41 | 16 | 0 | -1.92968 | 1.24097 | 0.50387  |
| 42 | 17 | 0 | -6.42391 | -2.7697 | -0.07957 |

---

Total Energy (a.u.) = -1866.495236 ; **NIMAG = i163.23**

**Table S25.** Cartesian coordinates, energy (u.a.) and number of imaginary frequencies (NIMAG) for Transition State (TS2) associated to the departure of BZS- anion from **8a** with two explicit water molecule, calculated using B3LYP/6-31G++(d,p) level theory

| Center Number | Atomic Number | Atomic Type | Coordinates (Angstroms) |          |          |
|---------------|---------------|-------------|-------------------------|----------|----------|
|               |               |             | X                       | Y        | Z        |
| 1             | 6             | 0           | -0.76511                | 0.63599  | 0.18884  |
| 2             | 8             | 0           | 0.13725                 | 1.34861  | -0.51027 |
| 3             | 6             | 0           | -2.74697                | 1.96541  | 0.87423  |
| 4             | 6             | 0           | -2.27257                | 1.74532  | -1.5733  |
| 5             | 6             | 0           | -4.16669                | 2.36039  | 0.48151  |
| 6             | 1             | 0           | -2.1008                 | 2.84125  | 0.97329  |
| 7             | 1             | 0           | -2.74319                | 1.36893  | 1.78856  |
| 8             | 6             | 0           | -3.72994                | 2.12976  | -1.81098 |
| 9             | 1             | 0           | -1.63487                | 2.62901  | -1.56734 |
| 10            | 1             | 0           | -1.90962                | 1.02967  | -2.31256 |
| 11            | 1             | 0           | -4.55098                | 3.07766  | 1.21043  |
| 12            | 1             | 0           | -4.81804                | 1.47479  | 0.48853  |
| 13            | 1             | 0           | -3.80524                | 2.67603  | -2.75388 |
| 14            | 1             | 0           | -4.3604                 | 1.23142  | -1.87326 |
| 15            | 7             | 0           | -2.15206                | 1.08819  | -0.21897 |
| 16            | 8             | 0           | -4.20532                | 2.9996   | -0.78918 |
| 17            | 6             | 0           | -0.48739                | -2.45918 | -0.47124 |
| 18            | 6             | 0           | -0.33091                | -2.5684  | 0.92499  |
| 19            | 6             | 0           | -0.30783                | -3.62555 | -1.24401 |
| 20            | 6             | 0           | -0.00797                | -3.79305 | 1.51958  |
| 21            | 1             | 0           | -0.46241                | -1.69268 | 1.55095  |
| 22            | 6             | 0           | 0.01051                 | -4.84514 | -0.64543 |
| 23            | 1             | 0           | -0.41928                | -3.56522 | -2.32215 |
| 24            | 6             | 0           | 0.16426                 | -4.94032 | 0.74222  |
| 25            | 1             | 0           | 0.10947                 | -3.84475 | 2.59952  |
| 26            | 1             | 0           | 0.14235                 | -5.72603 | -1.26877 |
| 27            | 6             | 0           | 1.50647                 | 1.11609  | -0.34463 |
| 28            | 6             | 0           | 2.31805                 | 2.24404  | -0.46862 |
| 29            | 6             | 0           | 2.02956                 | -0.16258 | -0.15303 |
| 30            | 6             | 0           | 3.69927                 | 2.09812  | -0.38622 |
| 31            | 1             | 0           | 1.8679                  | 3.21755  | -0.62834 |
| 32            | 6             | 0           | 3.41291                 | -0.30547 | -0.06915 |
| 33            | 1             | 0           | 1.37631                 | -1.02129 | -0.08249 |
| 34            | 6             | 0           | 4.22637                 | 0.82203  | -0.18415 |

|    |    |   |          |          |          |
|----|----|---|----------|----------|----------|
| 35 | 1  | 0 | 4.36329  | 2.94863  | -0.47402 |
| 36 | 1  | 0 | 3.86096  | -1.28038 | 0.07671  |
| 37 | 7  | 0 | 5.68694  | 0.66396  | -0.0913  |
| 38 | 8  | 0 | 6.38152  | 1.67581  | -0.20995 |
| 39 | 8  | 0 | 6.13108  | -0.46843 | 0.10124  |
| 40 | 16 | 0 | -0.89632 | -0.91762 | -1.28328 |
| 41 | 8  | 0 | -3.55902 | -0.60454 | 2.64917  |
| 42 | 1  | 0 | -2.64151 | -0.37822 | 2.84148  |
| 43 | 1  | 0 | -3.61229 | -0.80774 | 1.70236  |
| 44 | 8  | 0 | -3.68139 | -0.94999 | -0.21659 |
| 45 | 1  | 0 | -4.21894 | -1.74809 | -0.28983 |
| 46 | 1  | 0 | -2.90776 | -0.9924  | -0.84499 |
| 47 | 1  | 0 | 0.415    | -5.88969 | 1.20624  |
| 48 | 16 | 0 | -0.57409 | -0.10937 | 1.55323  |

-----  
Total Energy (a.u.) = -2400.926847 ; **NIMAG = i144.07**

**Table S26.** Cartesian coordinates, energy (u.a.) and number of imaginary frequencies (NIMAG) for Transition State (TS2) associated to the departure of 4NPO- anion from **8a** with two explicit water molecule, calculated using B3LYP/6-31G++(d,p) level theory

| Center Number | Atomic Number | Atomic Type | Coordinates (Angstroms) |          |          |
|---------------|---------------|-------------|-------------------------|----------|----------|
|               |               |             | X                       | Y        | Z        |
| 1             | 6             | 0           | 0.91589                 | -0.71756 | 0.92134  |
| 2             | 8             | 0           | -0.20405                | -0.48251 | -0.81222 |
| 3             | 6             | 0           | 2.64482                 | -0.54817 | -1.03732 |
| 4             | 6             | 0           | 3.12668                 | -1.92773 | 0.94278  |
| 5             | 6             | 0           | 3.61262                 | -1.43427 | -1.81634 |
| 6             | 1             | 0           | 3.17981                 | 0.28293  | -0.58147 |
| 7             | 1             | 0           | 1.83697                 | -0.1719  | -1.66138 |
| 8             | 6             | 0           | 4.09917                 | -2.72268 | 0.07425  |
| 9             | 1             | 0           | 3.61812                 | -1.08207 | 1.42871  |
| 10            | 1             | 0           | 2.65791                 | -2.56235 | 1.6954   |
| 11            | 1             | 0           | 4.09955                 | -0.83336 | -2.58776 |
| 12            | 1             | 0           | 3.07726                 | -2.26334 | -2.30122 |
| 13            | 1             | 0           | 4.93512                 | -3.05756 | 0.6934   |
| 14            | 1             | 0           | 3.59747                 | -3.61141 | -0.34031 |
| 15            | 7             | 0           | 2.01936                 | -1.36038 | 0.07774  |
| 16            | 8             | 0           | 4.64527                 | -1.93518 | -0.97239 |

|    |    |   |          |          |          |
|----|----|---|----------|----------|----------|
| 17 | 6  | 0 | 1.72996  | 2.11834  | 0.3702   |
| 18 | 6  | 0 | 2.93435  | 2.79352  | 0.61646  |
| 19 | 6  | 0 | 0.91347  | 2.50286  | -0.70148 |
| 20 | 6  | 0 | 3.32864  | 3.84208  | -0.21922 |
| 21 | 1  | 0 | 3.55585  | 2.50372  | 1.45858  |
| 22 | 6  | 0 | 1.32546  | 3.53997  | -1.54112 |
| 23 | 1  | 0 | -0.02279 | 1.99055  | -0.88283 |
| 24 | 6  | 0 | 2.52913  | 4.21145  | -1.3036  |
| 25 | 1  | 0 | 4.26011  | 4.36438  | -0.02211 |
| 26 | 1  | 0 | 0.69377  | 3.83213  | -2.37486 |
| 27 | 6  | 0 | -1.52004 | -0.33148 | -0.6975  |
| 28 | 6  | 0 | -2.37251 | -0.95527 | -1.64973 |
| 29 | 6  | 0 | -2.12471 | 0.45078  | 0.32006  |
| 30 | 6  | 0 | -3.74814 | -0.79365 | -1.60248 |
| 31 | 1  | 0 | -1.92706 | -1.54099 | -2.44877 |
| 32 | 6  | 0 | -3.50406 | 0.60117  | 0.37653  |
| 33 | 1  | 0 | -1.51065 | 0.93752  | 1.06667  |
| 34 | 6  | 0 | -4.31128 | -0.01842 | -0.58214 |
| 35 | 1  | 0 | -4.39408 | -1.25813 | -2.33779 |
| 36 | 1  | 0 | -3.96267 | 1.20007  | 1.15422  |
| 37 | 7  | 0 | -5.75663 | 0.14438  | -0.52125 |
| 38 | 8  | 0 | -6.44246 | -0.40758 | -1.39093 |
| 39 | 8  | 0 | -6.22926 | 0.82486  | 0.39705  |
| 40 | 16 | 0 | 1.20266  | 0.91004  | 1.60835  |
| 41 | 8  | 0 | 0.53288  | -2.97114 | -1.58669 |
| 42 | 1  | 0 | -0.05725 | -3.66628 | -1.26758 |
| 43 | 1  | 0 | 0.03591  | -2.1199  | -1.49371 |
| 44 | 8  | 0 | -1.79755 | 0.34432  | 4.04522  |
| 45 | 1  | 0 | -1.26933 | -0.24517 | 3.4825   |
| 46 | 1  | 0 | -2.6838  | -0.03796 | 4.05128  |
| 47 | 16 | 0 | 0.08232  | -1.76358 | 1.91991  |
| 48 | 1  | 0 | 2.83689  | 5.02368  | -1.95524 |

-----  
Total Energy (a.u.) = -2400.928776 ; **NIMAG = i144.61**

**Table S27.** Cartesian coordinates, energy (u.a.) and number of imaginary frequencies (NIMAG) for Transition State (TS2) associated to the departure of 4-Cl-BZS- anion from

**8b** with two explicit water molecule, calculated using B3LYP/6-31G++(d,p) level theory

| Center<br>Number | Atomic<br>Number | Atomic<br>Type | Coordinates (Angstroms) |          |          |
|------------------|------------------|----------------|-------------------------|----------|----------|
|                  |                  |                | X                       | Y        | Z        |
| 1                | 6                | 0              | -0.76389                | 0.63498  | 0.1302   |
| 2                | 8                | 0              | 0.13847                 | 1.34759  | -0.56891 |
| 3                | 6                | 0              | -2.74575                | 1.9644   | 0.8156   |
| 4                | 6                | 0              | -2.27135                | 1.7443   | -1.63194 |
| 5                | 6                | 0              | -4.16547                | 2.35937  | 0.42287  |
| 6                | 1                | 0              | -2.09958                | 2.84023  | 0.91465  |
| 7                | 1                | 0              | -2.74196                | 1.36791  | 1.72992  |
| 8                | 6                | 0              | -3.72871                | 2.12874  | -1.86961 |
| 9                | 1                | 0              | -1.63364                | 2.62799  | -1.62598 |
| 10               | 1                | 0              | -1.90839                | 1.02865  | -2.3712  |
| 11               | 1                | 0              | -4.54975                | 3.07664  | 1.15179  |
| 12               | 1                | 0              | -4.81682                | 1.47377  | 0.42989  |
| 13               | 1                | 0              | -3.80401                | 2.67501  | -2.81252 |
| 14               | 1                | 0              | -4.35918                | 1.23041  | -1.9319  |
| 15               | 7                | 0              | -2.15084                | 1.08717  | -0.27761 |
| 16               | 8                | 0              | -4.20409                | 2.99859  | -0.84781 |
| 17               | 6                | 0              | -0.42922                | -2.61015 | -1.66222 |
| 18               | 6                | 0              | 0.45454                 | -2.88085 | -2.72596 |
| 19               | 6                | 0              | -0.92157                | -3.70675 | -0.92406 |
| 20               | 6                | 0              | 0.82731                 | -4.19331 | -3.03594 |
| 21               | 1                | 0              | 0.8539                  | -2.06245 | -3.3148  |
| 22               | 6                | 0              | -0.54355                | -5.0134  | -1.23519 |
| 23               | 1                | 0              | -1.60698                | -3.52332 | -0.10246 |
| 24               | 6                | 0              | 0.33402                 | -5.2692  | -2.29477 |
| 25               | 1                | 0              | 1.5085                  | -4.37042 | -3.86501 |
| 26               | 1                | 0              | -0.94055                | -5.83706 | -0.64708 |
| 27               | 6                | 0              | 1.5077                  | 1.11508  | -0.40327 |
| 28               | 6                | 0              | 2.31928                 | 2.24302  | -0.52726 |
| 29               | 6                | 0              | 2.03079                 | -0.1636  | -0.21167 |
| 30               | 6                | 0              | 3.7005                  | 2.09711  | -0.44486 |
| 31               | 1                | 0              | 1.86913                 | 3.21653  | -0.68697 |
| 32               | 6                | 0              | 3.41414                 | -0.30648 | -0.12779 |
| 33               | 1                | 0              | 1.37754                 | -1.02231 | -0.14113 |
| 34               | 6                | 0              | 4.2276                  | 0.82101  | -0.24279 |
| 35               | 1                | 0              | 4.36452                 | 2.94762  | -0.53265 |
| 36               | 1                | 0              | 3.86219                 | -1.28139 | 0.01807  |
| 37               | 7                | 0              | 5.68817                 | 0.66294  | -0.14994 |
| 38               | 8                | 0              | 6.38275                 | 1.67479  | -0.26859 |
| 39               | 8                | 0              | 6.13231                 | -0.46944 | 0.0426   |
| 40               | 16               | 0              | -0.94126                | -0.95183 | -1.22535 |

|    |    |   |          |          |          |
|----|----|---|----------|----------|----------|
| 41 | 8  | 0 | -3.5671  | -0.60275 | 2.65739  |
| 42 | 1  | 0 | -2.63493 | -0.80414 | 2.51414  |
| 43 | 1  | 0 | -3.98875 | -0.55881 | 1.78512  |
| 44 | 8  | 0 | -3.77001 | -0.94623 | -0.20058 |
| 45 | 1  | 0 | -3.95641 | -1.89082 | -0.26614 |
| 46 | 1  | 0 | -2.95602 | -0.7145  | -0.7287  |
| 47 | 17 | 0 | 0.80539  | -6.91864 | -2.68815 |
| 48 | 8  | 0 | -0.57413 | -0.10543 | 1.48553  |

-----  
Total Energy (a.u.) = -2400.117797 ; **NIMAG = i147.56**

**Table S28.** Cartesian coordinates, energy (u.a.) and number of imaginary frequencies (NIMAG) for Transition State (TS2) associated to the departure of 4NPO- anion from **8b** with two explicit water molecule, calculated using B3LYP/6-31G++(d,p) level theory

| Center Number | Atomic Number | Atomic Type | Coordinates (Angstroms) |          |          |
|---------------|---------------|-------------|-------------------------|----------|----------|
|               |               |             | X                       | Y        | Z        |
| 1             | 6             | 0           | 0.92336                 | -0.71912 | 0.9277   |
| 2             | 8             | 0           | -0.20698                | -0.48191 | -0.81674 |
| 3             | 6             | 0           | 2.65227                 | -0.54973 | -1.03095 |
| 4             | 6             | 0           | 3.13415                 | -1.92929 | 0.94914  |
| 5             | 6             | 0           | 3.62009                 | -1.43583 | -1.80998 |
| 6             | 1             | 0           | 3.18728                 | 0.28136  | -0.57511 |
| 7             | 1             | 0           | 1.84444                 | -0.17346 | -1.65501 |
| 8             | 6             | 0           | 4.10664                 | -2.72425 | 0.08061  |
| 9             | 1             | 0           | 3.62560                 | -1.08363 | 1.43507  |
| 10            | 1             | 0           | 2.66538                 | -2.56392 | 1.70176  |
| 11            | 1             | 0           | 4.10703                 | -0.83492 | -2.58139 |
| 12            | 1             | 0           | 3.08473                 | -2.26491 | -2.29486 |
| 13            | 1             | 0           | 4.94259                 | -3.05913 | 0.69977  |
| 14            | 1             | 0           | 3.60495                 | -3.61297 | -0.33395 |
| 15            | 7             | 0           | 2.02683                 | -1.36194 | 0.0841   |
| 16            | 8             | 0           | 4.65275                 | -1.93674 | -0.96603 |
| 17            | 6             | 0           | 1.82007                 | 2.09502  | 0.3936   |
| 18            | 6             | 0           | 3.02483                 | 2.74828  | 0.69165  |
| 19            | 6             | 0           | 1.06338                 | 2.48627  | -0.7188  |
| 20            | 6             | 0           | 3.47958                 | 3.78134  | -0.13255 |
| 21            | 1             | 0           | 3.59963                 | 2.45365  | 1.56471  |
| 22            | 6             | 0           | 1.53575                 | 3.50743  | -1.54602 |
| 23            | 1             | 0           | 0.12668                 | 1.99102  | -0.94053 |

|    |    |   |          |          |          |
|----|----|---|----------|----------|----------|
| 24 | 6  | 0 | 2.74016  | 4.15691  | -1.25669 |
| 25 | 1  | 0 | 4.41105  | 4.28673  | 0.10462  |
| 26 | 1  | 0 | 0.95045  | 3.80469  | -2.41121 |
| 27 | 6  | 0 | -1.52296 | -0.33087 | -0.70202 |
| 28 | 6  | 0 | -2.37544 | -0.95466 | -1.65425 |
| 29 | 6  | 0 | -2.12763 | 0.45139  | 0.31555  |
| 30 | 6  | 0 | -3.75107 | -0.79304 | -1.60699 |
| 31 | 1  | 0 | -1.92998 | -1.54037 | -2.45328 |
| 32 | 6  | 0 | -3.50698 | 0.60178  | 0.37201  |
| 33 | 1  | 0 | -1.51357 | 0.93813  | 1.06215  |
| 34 | 6  | 0 | -4.3142  | -0.01781 | -0.58665 |
| 35 | 1  | 0 | -4.3970  | -1.25751 | -2.3423  |
| 36 | 1  | 0 | -3.96564 | 1.20068  | 1.14971  |
| 37 | 7  | 0 | -5.75952 | 0.14499  | -0.52576 |
| 38 | 8  | 0 | -6.44538 | -0.40697 | -1.39545 |
| 39 | 8  | 0 | -6.23218 | 0.82547  | 0.39254  |
| 40 | 16 | 0 | 1.21013  | 0.90847  | 1.61471  |
| 41 | 8  | 0 | 0.52833  | -2.97019 | -1.58854 |
| 42 | 1  | 0 | -0.05215 | -3.66965 | -1.26128 |
| 43 | 1  | 0 | 0.03543  | -2.12014 | -1.46731 |
| 44 | 8  | 0 | -1.79755 | 0.34432  | 4.04522  |
| 45 | 1  | 0 | -1.32796 | -0.32984 | 3.52736  |
| 46 | 1  | 0 | -2.73364 | 0.20053  | 3.85899  |
| 47 | 16 | 0 | 0.08980  | -1.76514 | 1.92627  |
| 48 | 1  | 0 | 3.31521  | 5.45381  | -2.29831 |

---

Total Energy (a.u.) = -2400.120378 ; **NIMAG = i145.85**

**Table S29.** Cartesian coordinates, energy (u.a.) and number of imaginary frequencies (NIMAG) for Transition State (TS2) associated to the departure of BZS- anion from **9a** with two explicit water molecule, calculated using B3LYP/6-31G++(d,p) level theory

---



| Center<br>Number | Atomic<br>Number | Atomic<br>Type | Coordinates (Angstroms) |          |          |
|------------------|------------------|----------------|-------------------------|----------|----------|
|                  |                  |                | X                       | Y        | Z        |
| 1                | 6                | 0              | 0.92861                 | -0.66381 | 0.46717  |
| 2                | 8                | 0              | 0.27587                 | -1.66834 | -0.44535 |
| 3                | 6                | 0              | 3.23198                 | -1.91543 | 0.85901  |
| 4                | 6                | 0              | 2.62058                 | -1.28662 | -1.48816 |
| 5                | 6                | 0              | 4.68875                 | -1.84964 | 0.41142  |
| 6                | 1                | 0              | 2.82715                 | -2.92466 | 0.74622  |
| 7                | 1                | 0              | 3.12651                 | -1.55976 | 1.88593  |
| 8                | 6                | 0              | 4.11685                 | -1.24323 | -1.78161 |
| 9                | 1                | 0              | 2.21664                 | -2.27864 | -1.69246 |
| 10               | 1                | 0              | 2.06341                 | -0.53516 | -2.05236 |
| 11               | 1                | 0              | 5.26584                 | -2.58835 | 0.97209  |
| 12               | 1                | 0              | 5.10364                 | -0.85452 | 0.62607  |
| 13               | 1                | 0              | 4.28463                 | -1.53664 | -2.82024 |
| 14               | 1                | 0              | 4.51222                 | -0.22605 | -1.642   |
| 15               | 7                | 0              | 2.39969                 | -0.9928  | -0.02166 |
| 16               | 8                | 0              | 4.82988                 | -2.16767 | -0.96779 |
| 17               | 6                | 0              | -0.51582                | 2.27038  | 0.34516  |
| 18               | 6                | 0              | -0.80439                | 2.17317  | 1.72211  |
| 19               | 6                | 0              | -1.17574                | 3.27667  | -0.39091 |
| 20               | 6                | 0              | -1.71274                | 3.04236  | 2.3333   |
| 21               | 1                | 0              | -0.30871                | 1.41174  | 2.31753  |
| 22               | 6                | 0              | -2.08399                | 4.14111  | 0.22248  |
| 23               | 1                | 0              | -0.96005                | 3.37983  | -1.44733 |
| 24               | 6                | 0              | -2.36107                | 4.03128  | 1.58914  |
| 25               | 1                | 0              | -1.9124                 | 2.94299  | 3.39764  |
| 26               | 1                | 0              | -2.57521                | 4.90823  | -0.37106 |
| 27               | 6                | 0              | -1.12233                | -1.67719 | -0.24021 |
| 28               | 6                | 0              | -1.72532                | -2.92013 | -0.07269 |
| 29               | 6                | 0              | -1.83588                | -0.48419 | -0.29554 |
| 30               | 6                | 0              | -3.11114                | -2.97592 | 0.05983  |
| 31               | 1                | 0              | -1.12314                | -3.82164 | -0.04815 |
| 32               | 6                | 0              | -3.22169                | -0.54247 | -0.15859 |
| 33               | 1                | 0              | -1.31699                | 0.45508  | -0.4597  |
| 34               | 6                | 0              | -3.8349                 | -1.78365 | 0.01764  |
| 35               | 1                | 0              | -3.62901                | -3.91704 | 0.19498  |
| 36               | 1                | 0              | -3.82113                | 0.35853  | -0.19228 |
| 37               | 7                | 0              | -5.30221                | -1.8415  | 0.16187  |
| 38               | 8                | 0              | -5.81782                | -2.94948 | 0.32156  |
| 39               | 8                | 0              | -5.92387                | -0.78061 | 0.11584  |
| 40               | 16               | 0              | 0.63114                 | 1.16027  | -0.45575 |
| 41               | 8                | 0              | 3.90393                 | 0.54316  | 3.03318  |
| 42               | 1                | 0              | 3.48443                 | 0.6993   | 3.88792  |
| 43               | 1                | 0              | 3.34472                 | 0.97747  | 2.36378  |

|    |   |   |          |          |         |
|----|---|---|----------|----------|---------|
| 44 | 8 | 0 | 3.14558  | 1.53747  | 0.51744 |
| 45 | 1 | 0 | 3.77274  | 2.17617  | 0.15124 |
| 46 | 1 | 0 | 2.23388  | 1.73544  | 0.10838 |
| 47 | 1 | 0 | -3.06698 | 4.70568  | 2.06489 |
| 48 | 8 | 0 | 0.80878  | -0.54426 | 1.65014 |

-----  
Total Energy (a.u.) = -2409.438161027; **NIMAG = i142.25**

**Table S30.** Cartesian coordinates, energy (u.a.) and number of imaginary frequencies (NIMAG) for Transition State (TS2) associated to the departure of 4NPO- anion from **9b** with two explicit water molecule, calculated using B3LYP/6-31G++(d,p) level theory

| Center Number | Atomic Number | Atomic Type | Coordinates (Angstroms) |          |          |
|---------------|---------------|-------------|-------------------------|----------|----------|
|               |               |             | X                       | Y        | Z        |
| 1             | 6             | 0           | 0.89983                 | -0.69693 | 0.95697  |
| 2             | 8             | 0           | -0.19942                | -0.48348 | -0.80505 |
| 3             | 6             | 0           | 2.62874                 | -0.52753 | -1.00168 |
| 4             | 6             | 0           | 3.11062                 | -1.90709 | 0.97841  |
| 5             | 6             | 0           | 3.59657                 | -1.41364 | -1.78071 |
| 6             | 1             | 0           | 3.16376                 | 0.30356  | -0.54584 |
| 7             | 1             | 0           | 1.82091                 | -0.15127 | -1.62574 |
| 8             | 6             | 0           | 4.08311                 | -2.70205 | 0.10988  |
| 9             | 1             | 0           | 3.60207                 | -1.06144 | 1.46434  |
| 10            | 1             | 0           | 2.64186                 | -2.54172 | 1.73103  |
| 11            | 1             | 0           | 4.0835                  | -0.81273 | -2.55212 |
| 12            | 1             | 0           | 3.06121                 | -2.24271 | -2.26559 |
| 13            | 1             | 0           | 4.91907                 | -3.03693 | 0.72904  |
| 14            | 1             | 0           | 3.58142                 | -3.59078 | -0.30468 |
| 15            | 7             | 0           | 2.0033                  | -1.33975 | 0.11337  |
| 16            | 8             | 0           | 4.62922                 | -1.91454 | -0.93676 |
| 17            | 6             | 0           | 1.64357                 | 2.15605  | 0.39472  |
| 18            | 6             | 0           | 2.84534                 | 2.84998  | 0.59766  |
| 19            | 6             | 0           | 0.77847                 | 2.5338   | -0.64063 |
| 20            | 6             | 0           | 3.18826                 | 3.91068  | -0.24534 |
| 21            | 1             | 0           | 3.50489                 | 2.56516  | 1.41211  |
| 22            | 6             | 0           | 1.13907                 | 3.58339  | -1.48837 |
| 23            | 1             | 0           | -0.1555                 | 2.00685  | -0.78822 |
| 24            | 6             | 0           | 2.33988                 | 4.27366  | -1.29416 |
| 25            | 1             | 0           | 4.11801                 | 4.44743  | -0.08174 |
| 26            | 1             | 0           | 0.46969                 | 3.87034  | -2.29403 |
| 27            | 6             | 0           | -1.5154                 | -0.33246 | -0.69032 |
| 28            | 6             | 0           | -2.36788                | -0.95625 | -1.64256 |
| 29            | 6             | 0           | -2.12007                | 0.44981  | 0.32724  |

|    |    |   |          |          |          |
|----|----|---|----------|----------|----------|
| 30 | 6  | 0 | -3.7435  | -0.79462 | -1.5953  |
| 31 | 1  | 0 | -1.92242 | -1.54196 | -2.44159 |
| 32 | 6  | 0 | -3.49942 | 0.6002   | 0.3837   |
| 33 | 1  | 0 | -1.50601 | 0.93654  | 1.07385  |
| 34 | 6  | 0 | -4.30664 | -0.01939 | -0.57496 |
| 35 | 1  | 0 | -4.38944 | -1.2591  | -2.33061 |
| 36 | 1  | 0 | -3.95804 | 1.19909  | 1.1614   |
| 37 | 7  | 0 | -5.75196 | 0.14341  | -0.51407 |
| 38 | 8  | 0 | -6.43782 | -0.40855 | -1.38375 |
| 39 | 8  | 0 | -6.22462 | 0.82389  | 0.40423  |
| 40 | 16 | 0 | 1.18661  | 0.93067  | 1.64398  |
| 41 | 8  | 0 | 0.53288  | -2.97114 | -1.58669 |
| 42 | 1  | 0 | -0.03921 | -3.71158 | -1.34635 |
| 43 | 1  | 0 | 0.06416  | -2.15034 | -1.29202 |
| 44 | 8  | 0 | -1.7756  | 0.32261  | 4.0193   |
| 45 | 1  | 0 | -1.17598 | -0.11097 | 3.3903   |
| 46 | 1  | 0 | -2.60907 | -0.15892 | 3.9481   |
| 47 | 1  | 0 | 2.60764  | 5.09536  | -1.95156 |
| 48 | 17 | 0 | 0.24998  | -1.51241 | 1.73547  |

-----  
Total Energy (a.u.) = -2409.448073 ; **NIMAG = i144.32**

**Table S31.** Cartesian coordinates, energy (u.a.) and number of imaginary frequencies (NIMAG) for Transition State (TS2) associated to the departure of 4-Cl-BZS- anion from **9b** with two explicit water molecule, calculated using B3LYP/6-31G++(d,p) level theory

| Center<br>Number | Atomic<br>Number | Atomic<br>Type | Coordinates (Angstroms) |         |          |
|------------------|------------------|----------------|-------------------------|---------|----------|
|                  |                  |                | X                       | Y       | Z        |
| 1                | 6                | 0              | -0.81025                | 0.62211 | 0.14503  |
| 2                | 8                | 0              | 0.09211                 | 1.33473 | -0.55407 |
| 3                | 6                | 0              | -2.79211                | 1.95153 | 0.83043  |
| 4                | 6                | 0              | -2.31771                | 1.73144 | -1.61711 |
| 5                | 6                | 0              | -4.21183                | 2.34651 | 0.43771  |
| 6                | 1                | 0              | -2.14594                | 2.82737 | 0.92948  |
| 7                | 1                | 0              | -2.78833                | 1.35505 | 1.74475  |

|    |    |   |          |          |          |
|----|----|---|----------|----------|----------|
| 8  | 6  | 0 | -3.77508 | 2.11588  | -1.85478 |
| 9  | 1  | 0 | -1.6801  | 2.61513  | -1.61115 |
| 10 | 1  | 0 | -1.95475 | 1.01579  | -2.35637 |
| 11 | 1  | 0 | -4.59612 | 3.06378  | 1.16663  |
| 12 | 1  | 0 | -4.86318 | 1.4609   | 0.44472  |
| 13 | 1  | 0 | -3.85038 | 2.66215  | -2.79769 |
| 14 | 1  | 0 | -4.40554 | 1.21754  | -1.91707 |
| 15 | 7  | 0 | -2.1972  | 1.0743   | -0.26278 |
| 16 | 8  | 0 | -4.25046 | 2.98572  | -0.83298 |
| 17 | 6  | 0 | 0.06389  | -2.07278 | -2.22179 |
| 18 | 6  | 0 | 0.32121  | -1.90835 | -3.59751 |
| 19 | 6  | 0 | 0.57853  | -3.22532 | -1.59201 |
| 20 | 6  | 0 | 1.0613   | -2.85819 | -4.31001 |
| 21 | 1  | 0 | -0.05795 | -1.03387 | -4.11473 |
| 22 | 6  | 0 | 1.31918  | -4.16756 | -2.30662 |
| 23 | 1  | 0 | 0.38978  | -3.37574 | -0.53362 |
| 24 | 6  | 0 | 1.56698  | -3.9933  | -3.67282 |
| 25 | 1  | 0 | 1.24033  | -2.70492 | -5.3717  |
| 26 | 1  | 0 | 1.7022   | -5.04537 | -1.79219 |
| 27 | 6  | 0 | 1.46134  | 1.10221  | -0.38844 |
| 28 | 6  | 0 | 2.27292  | 2.23015  | -0.51242 |
| 29 | 6  | 0 | 1.98443  | -0.17646 | -0.19684 |
| 30 | 6  | 0 | 3.65413  | 2.08424  | -0.43003 |
| 31 | 1  | 0 | 1.82276  | 3.20367  | -0.67214 |
| 32 | 6  | 0 | 3.36777  | -0.31935 | -0.11296 |
| 33 | 1  | 0 | 1.33117  | -1.03517 | -0.12629 |
| 34 | 6  | 0 | 4.18124  | 0.80815  | -0.22796 |
| 35 | 1  | 0 | 4.31815  | 2.93475  | -0.51782 |
| 36 | 1  | 0 | 3.81582  | -1.29426 | 0.03291  |
| 37 | 7  | 0 | 5.6418   | 0.65008  | -0.1351  |
| 38 | 8  | 0 | 6.33638  | 1.66193  | -0.25376 |
| 39 | 8  | 0 | 6.08594  | -0.48231 | 0.05743  |
| 40 | 16 | 0 | -0.87931 | -0.89126 | -1.26395 |
| 41 | 8  | 0 | -3.51862 | -0.59643 | 2.60293  |
| 42 | 1  | 0 | -2.56904 | -0.63243 | 2.43857  |
| 43 | 1  | 0 | -3.96045 | -0.61682 | 1.73983  |
| 44 | 8  | 0 | -3.69964 | -0.94723 | -0.1886  |
| 45 | 1  | 0 | -4.22481 | -1.75456 | -0.24944 |
| 46 | 1  | 0 | -2.83664 | -1.05562 | -0.67716 |
| 47 | 17 | 0 | 2.49735  | -5.18575 | -4.57286 |
| 48 | 8  | 0 | -0.64483 | -0.02337 | 1.32659  |

---

Total Energy (a.u.) = 2409.141067 ; **NIMAG = 144.95**

**Table S32.** Cartesian coordinates, energy (u.a.) and number of imaginary frequencies (NIMAG) for Transition State (TS2) associated to the departure of 4NPO- anion from **9b** with two explicit water molecule, calculated using B3LYP/6-31G++(d,p) level theory

| Center Number | Atomic Number | Atomic Type | Coordinates (Angstroms) |           |           |
|---------------|---------------|-------------|-------------------------|-----------|-----------|
|               |               |             | X                       | Y         | Z         |
| 1             | 6             | 0           | -1.331210               | -0.044060 | 0.073407  |
| 2             | 8             | 0           | -0.797816               | 1.897521  | -0.072502 |
| 3             | 6             | 0           | -3.222096               | 1.082411  | -1.383394 |
| 4             | 6             | 0           | -3.742989               | -0.783248 | 0.152574  |
| 5             | 6             | 0           | -4.698635               | 1.466172  | -1.311330 |
| 6             | 1             | 0           | -3.052037               | 0.377109  | -2.199206 |
| 7             | 1             | 0           | -2.571909               | 1.949334  | -1.493822 |
| 8             | 6             | 0           | -5.193959               | -0.311341 | 0.133001  |
| 9             | 1             | 0           | -3.549877               | -1.513082 | -0.637369 |
| 10            | 1             | 0           | -3.484691               | -1.189753 | 1.130476  |
| 11            | 1             | 0           | -5.004917               | 1.902343  | -2.264972 |
| 12            | 1             | 0           | -4.860921               | 2.212479  | -0.518120 |
| 13            | 1             | 0           | -5.856725               | -1.174722 | 0.227424  |
| 14            | 1             | 0           | -5.378821               | 0.363427  | 0.982089  |
| 15            | 7             | 0           | -2.831357               | 0.393766  | -0.103361 |
| 16            | 8             | 0           | -5.523385               | 0.327974  | -1.095036 |
| 17            | 6             | 0           | 0.406831                | -2.003271 | -0.875228 |
| 18            | 6             | 0           | -0.096109               | -3.309539 | -0.833375 |
| 19            | 6             | 0           | 1.733854                | -1.755183 | -0.504765 |
| 20            | 6             | 0           | 0.715485                | -4.363539 | -0.412843 |
| 21            | 1             | 0           | -1.120138               | -3.507252 | -1.132728 |
| 22            | 6             | 0           | 2.552303                | -2.803037 | -0.081541 |
| 23            | 1             | 0           | 2.125432                | -0.744391 | -0.538422 |
| 24            | 6             | 0           | 2.033861                | -4.098143 | -0.038342 |
| 25            | 1             | 0           | 0.331738                | -5.377134 | -0.377967 |
| 26            | 1             | 0           | 3.579796                | -2.615417 | 0.209733  |
| 27            | 6             | 0           | 0.504804                | 2.151870  | -0.029983 |
| 28            | 6             | 0           | 1.109475                | 2.907192  | -1.067348 |
| 29            | 6             | 0           | 1.325804                | 1.703634  | 1.037590  |
| 30            | 6             | 0           | 2.460856                | 3.216162  | -1.036981 |
| 31            | 1             | 0           | 0.485192                | 3.245613  | -1.888144 |
| 32            | 6             | 0           | 2.681946                | 2.000548  | 1.064807  |
| 33            | 1             | 0           | 0.876890                | 1.122865  | 1.835201  |
| 34            | 6             | 0           | 3.243820                | 2.756877  | 0.029797  |

|    |    |   |           |           |           |
|----|----|---|-----------|-----------|-----------|
| 35 | 1  | 0 | 2.924241  | 3.798717  | -1.824288 |
| 36 | 1  | 0 | 3.313565  | 1.665107  | 1.878999  |
| 37 | 7  | 0 | 4.664032  | 3.071765  | 0.062758  |
| 38 | 8  | 0 | 5.130174  | 3.756178  | -0.856644 |
| 39 | 8  | 0 | 5.336395  | 2.637771  | 1.007115  |
| 40 | 16 | 0 | -0.613782 | -0.664294 | -1.492444 |
| 41 | 8  | 0 | -3.433825 | -0.047607 | 3.275948  |
| 42 | 1  | 0 | -3.268666 | -0.517776 | 4.101941  |
| 43 | 1  | 0 | -2.578429 | 0.306153  | 2.986409  |
| 44 | 8  | 0 | -2.601734 | 2.471357  | 1.746108  |
| 45 | 1  | 0 | -1.758217 | 2.572924  | 1.241953  |
| 46 | 1  | 0 | -2.581896 | 3.040513  | 2.523407  |
| 47 | 8  | 0 | -1.051057 | -0.461970 | 1.172441  |
| 48 | 17 | 0 | 3.059239  | -5.420545 | 0.490017  |

---

Total Energy (a.u.) = 2409.130741 ; **NIMAG = i145.86**
